# Supplementary material for: Research trends and geographical distribution of mammalian carnivores in Portugal (SW Europe)
Source: PLoS One. 2018 Nov 29;13(11):e0207866. doi: 10.1371/journal.pone.0207866 (PMC6264823; doi:10.1371/journal.pone.0207866)
Supplement: S1 Dataset — (XLSX) [file pone.0207866.s003.xlsx]

## Sheet: Carnivore research and distribu
S1 Dataset - Classification of Portuguese Municipalities for each carnvore species according to two possible categories for historical presence records (after 2000): No records (0) and With records (1).
Municiplaity	Canis lupus	Vulpes vulpes	Mustela erminea	Mustela nivalis	Mustela putorius	Neovison vison	Martes foina	Martes martes	Meles meles	Lutra lutra	Genetta genetta	Herpestes ichneumon	Felis silvestris	Lynx pardinus	Ursus arctos
ABRANTES	1	0	0	0	0	0	0	0	1	1	0	1	0	0	0
ÁGUEDA	0	0	0	0	0	0	0	0	0	1	0	0	0	0	0
AGUIAR DA BEIRA	1	0	0	0	0	0	1	0	1	1	0	0	1	0	0
ALANDROAL	1	0	0	0	1	0	0	0	0	1	0	1	1	1	0
ALBERGARIA-A-VELHA	0	0	0	0	0	0	0	0	0	1	0	0	0	0	0
ALBUFEIRA	0	0	0	0	0	0	0	0	0	1	0	1	0	1	0
ALCÁCER DO SAL	1	0	0	0	1	0	1	0	0	1	0	1	1	1	0
ALCANENA	1	0	0	0	0	0	0	0	1	0	0	1	0	1	0
ALCOBAÇA	1	0	0	0	0	0	0	0	0	1	0	1	0	0	0
ALCOCHETE	0	0	0	0	0	0	0	0	0	1	0	1	0	1	0
ALCOUTIM	1	1	0	0	0	0	0	0	1	1	1	1	1	1	0
ALENQUER	1	0	0	0	0	0	0	0	0	0	0	1	1	0	0
ALFANDEGA DA FÉ	1	0	0	0	0	0	0	1	0	1	0	0	1	1	0
ALIJÓ	1	0	0	0	0	0	0	0	0	1	0	0	0	0	0
ALJEZUR	1	1	0	1	0	0	1	0	0	1	1	1	1	1	0
ALJUSTREL	0	0	0	0	0	0	0	0	0	1	0	1	0	0	0
ALMADA	0	0	0	0	0	0	0	0	0	0	0	1	0	0	0
ALMEIDA	1	0	0	0	0	0	0	0	0	1	0	1	0	0	0
ALMEIRIM	0	0	0	0	0	0	1	0	0	1	0	1	0	1	0
ALMODÔVAR	1	0	0	0	0	0	0	0	0	1	0	1	1	1	0
ALPIARÇA	0	0	0	0	0	0	0	0	0	1	0	1	0	0	0
ALTER DO CHÃO	1	0	0	0	0	0	0	0	0	1	0	1	1	0	0
ALVAIÁZERE	1	0	0	0	0	0	0	0	0	1	0	0	0	0	0
ALVITO	0	0	0	0	0	0	0	0	0	1	0	1	1	0	0
AMADORA	0	0	0	0	0	0	0	0	0	0	0	1	0	0	0
AMARANTE	1	0	0	0	0	0	0	0	1	1	0	0	1	0	0
AMARES	0	0	0	0	0	0	0	0	0	0	0	0	0	0	0
ANADIA	1	0	0	0	0	0	0	0	0	1	0	1	0	0	0
ANSIÃO	0	0	0	0	0	0	0	0	1	0	0	0	0	0	0
ARCOS DE VALDEVEZ	1	0	1	1	1	1	0	1	1	1	1	0	1	1	1
ARGANIL	1	0	0	0	0	0	0	0	0	1	1	0	0	0	0
ARMAMAR	0	0	0	0	0	0	0	0	0	0	0	0	0	0	0
AROUCA	1	0	0	0	0	0	0	0	0	1	0	0	0	0	0
ARRAIOLOS	1	0	0	0	0	0	0	0	0	1	0	1	1	0	0
ARRONCHES	1	0	0	0	0	0	0	0	0	1	0	1	1	1	0
ARRUDA DOS VINHOS	0	0	0	0	0	0	0	0	0	0	0	1	0	0	0
AVEIRO	0	0	0	0	0	0	0	0	0	1	0	0	0	0	0
AVIS	1	0	0	0	0	0	0	0	0	1	0	1	0	0	0
AZAMBUJA	0	0	0	0	0	0	1	0	0	1	0	1	0	0	0
BAIÃO	1	0	0	0	0	0	0	0	0	1	0	0	0	0	0
BARCELOS	0	0	0	0	0	0	0	0	0	1	0	0	0	0	0
BARRANCOS	1	0	0	0	0	0	0	0	1	1	0	1	1	1	0
BARREIRO	0	0	0	0	1	0	0	0	0	0	0	1	0	0	0
BATALHA	0	0	0	0	0	0	0	0	0	0	0	1	0	0	0
BEJA	0	0	0	0	0	0	0	0	0	1	0	1	0	1	1
BELMONTE	1	0	0	0	0	0	0	0	0	1	0	0	0	0	0
BENAVENTE	0	1	0	0	1	0	0	0	1	1	0	1	1	1	0
BOMBARRAL	1	0	0	0	0	0	0	0	0	0	0	1	0	0	0
BORBA	1	0	0	0	0	0	0	0	0	1	0	1	0	0	0
BOTICAS	1	0	1	0	0	0	0	1	1	1	0	0	1	1	0
BRAGA	1	0	0	0	0	0	0	0	0	1	0	0	1	0	0
BRAGANÇA	1	1	1	1	0	0	0	1	0	1	0	0	1	1	1
CABECEIRAS DE BASTO	1	0	1	0	0	0	1	1	0	1	0	0	1	0	0
CADAVAL	0	0	0	0	0	0	0	0	0	0	0	1	0	0	0
CALDAS DA RAINHA	0	0	0	0	0	0	0	0	0	1	0	1	0	0	0
CAMINHA	1	1	0	0	0	1	0	1	0	1	0	0	0	0	0
CAMPO MAIOR	1	0	0	0	0	0	0	0	0	1	0	1	1	1	0
CANTANHEDE	0	0	0	0	0	0	0	0	0	1	0	0	0	1	0
CARRAZEDA DE ANSIÃES	1	0	0	0	0	0	0	0	0	1	0	0	0	0	0
CARREGAL DO SAL	1	0	0	0	0	0	0	0	0	1	0	0	0	0	0
CARTAXO	0	0	0	0	0	0	0	0	0	0	0	1	0	0	0
CASCAIS	0	0	0	0	0	0	0	0	0	0	0	1	0	0	0
CASTANHEIRA DE PERA	0	0	0	0	0	0	0	0	0	0	0	0	0	0	0
CASTELO BRANCO	1	0	0	1	0	0	0	0	1	1	1	1	1	1	1
CASTELO DE PAIVA	0	0	0	0	0	0	0	0	0	0	0	0	0	0	0
CASTELO DE VIDE	1	0	0	0	0	0	0	0	0	1	0	1	1	1	0
CASTRO D'AIRE	1	0	0	0	0	0	0	0	0	1	0	0	1	0	0
CASTRO MARIM	0	1	0	0	0	0	0	0	0	1	0	1	1	1	0
CASTRO VERDE	0	1	0	1	1	0	1	0	0	1	0	1	0	0	0
CELORICO DA BEIRA	1	1	0	0	0	0	0	0	0	1	0	0	1	0	0
CELORICO DE BASTO	1	0	0	0	0	0	0	0	0	1	0	0	1	0	0
CHAMUSCA	0	0	0	0	1	0	0	0	0	1	0	1	0	0	0
CHAVES	1	0	1	0	0	1	0	0	0	1	0	0	1	0	0
CINFÃES	1	0	0	0	0	0	0	0	0	1	0	0	0	0	0
COIMBRA	0	0	0	0	1	0	0	0	1	1	0	1	0	0	0
CONDEIXA-A-NOVA	1	0	0	0	0	0	0	0	0	0	0	1	0	0	0
CONSTÂNCIA	0	0	0	0	0	0	0	0	0	0	0	1	0	0	0
CORUCHE	1	0	0	0	1	0	0	0	1	1	0	1	1	1	0
COVILHÃ	1	1	0	0	0	0	0	0	0	1	0	1	1	0	0
CRATO	1	0	0	0	0	0	0	0	0	1	0	1	0	1	0
CUBA	0	0	0	0	0	0	0	0	0	1	0	1	0	0	0
ELVAS	1	0	0	0	0	0	0	0	0	1	0	1	0	1	0
ENTRONCAMENTO	0	0	0	0	0	0	0	0	0	0	0	1	0	0	0
ESPINHO	0	0	0	0	0	0	0	0	0	0	0	0	0	0	0
ESPOSENDE	0	0	0	0	0	1	0	0	0	1	0	0	1	0	0
ESTARREJA	0	0	0	1	0	0	0	0	0	1	0	0	0	0	0
ESTREMOZ	0	0	0	0	0	0	0	0	0	1	0	1	1	1	0
ÉVORA	1	1	0	1	1	0	1	0	0	1	0	1	1	1	1
FAFE	1	0	0	0	0	0	0	0	0	1	0	0	1	0	0
FARO	0	0	0	0	0	0	0	0	1	1	0	1	1	0	0
FEIRA	1	0	0	0	0	0	0	0	0	1	0	0	0	0	0
FELGUEIRAS	1	0	0	0	0	0	0	0	0	1	0	0	0	0	0
FERREIRA DO ALENTEJO	1	0	0	0	0	0	0	0	0	1	0	1	1	1	0
FERREIRA DO ZÊZERE	0	0	0	0	0	0	0	0	0	1	0	1	0	0	0
FIGUEIRA DA FOZ	0	0	0	0	0	0	0	0	0	1	0	0	0	0	0
FIGUEIRA DE CASTELO RODRIGO	1	0	0	0	0	0	0	0	0	1	0	0	0	0	1
FIGUEIRÓ DOS VINHOS	1	0	0	0	0	0	0	0	0	1	0	1	0	0	0
FORNOS DE ALGODRES	1	0	0	0	0	0	0	0	0	1	0	0	1	0	0
FREIXO DE ESPADA À CINTA	1	0	0	0	0	0	0	1	0	1	0	0	1	0	0
FRONTEIRA	1	0	0	0	0	0	0	0	0	1	0	1	0	0	0
FUNDÃO	1	0	0	0	0	0	0	0	1	1	0	1	0	0	0
GAVIÃO	1	0	0	0	0	0	0	0	0	1	0	1	0	0	0
GÓIS	1	0	0	0	0	0	0	0	0	1	0	0	0	0	0
GOLEGÃ	1	1	0	0	0	0	0	0	0	1	1	1	0	0	0
GONDOMAR	0	0	0	0	0	0	0	0	0	0	0	0	0	0	0
GOUVEIA	1	1	0	0	0	0	0	0	0	1	0	1	1	1	0
GRÂNDOLA	1	1	0	1	1	0	1	0	1	1	1	1	1	1	0
GUARDA	1	1	0	0	0	0	0	0	0	1	0	1	1	0	1
GUIMARÃES	0	0	0	0	0	0	0	0	0	1	0	0	1	0	1
IDANHA-A-NOVA	1	0	0	0	1	0	1	0	1	1	0	1	1	1	0
ÍLHAVO	0	0	0	0	0	0	0	0	0	1	0	0	0	0	0
LAGOA	0	0	0	0	0	0	0	0	0	1	0	1	0	0	0
LAGOS	1	1	0	1	0	0	0	0	0	1	1	1	1	1	0
LAMEGO	1	0	0	0	0	0	0	0	0	1	0	0	0	0	0
LEIRIA	0	0	0	1	0	0	0	0	1	1	0	1	0	0	0
LISBOA	0	0	0	0	1	0	0	0	0	0	0	1	0	0	0
LOULÉ	1	1	0	1	0	0	1	0	1	1	1	1	1	1	0
LOURES	0	0	0	0	0	0	0	0	0	0	0	1	0	0	0
LOURINHÃ	1	0	0	0	0	0	1	0	0	0	0	1	0	0	0
LOUSÃ	0	0	0	0	0	0	0	0	0	1	0	0	0	0	0
LOUSADA	0	0	0	0	0	0	0	0	0	0	0	0	0	0	0
MAÇÃO	1	0	0	0	0	0	0	0	0	1	0	1	0	0	0
MACEDO DE CAVALEIROS	1	0	0	0	0	0	0	0	1	1	0	0	1	0	0
MAFRA	0	1	0	1	1	0	0	0	1	1	1	1	0	0	0
MAIA	0	0	0	0	0	0	0	0	0	1	0	0	0	0	0
MANGUALDE	1	0	0	0	0	0	0	0	0	1	0	0	0	0	0
MANTEIGAS	1	1	0	0	0	0	0	1	0	1	0	0	1	1	0
MARCO DE CANAVEZES	1	0	0	0	0	0	0	0	0	1	0	0	0	0	1
MARINHA GRANDE	0	0	0	0	0	0	0	0	0	1	0	0	0	1	0
MARVÃO	1	0	0	0	0	0	0	0	0	1	0	1	1	0	0
MATOSINHOS	0	0	0	1	0	0	0	0	0	1	0	0	0	0	0
MEALHADA	0	0	0	0	0	0	1	0	0	1	0	0	0	0	0
MEDA	1	0	0	0	0	0	0	0	0	1	0	0	1	0	0
MELGAÇO	1	1	1	1	1	1	1	1	0	1	0	0	1	1	0
MÉRTOLA	1	0	0	0	0	0	1	0	0	1	0	1	1	0	0
MESÃO FRIO	0	0	0	0	0	0	0	0	0	0	0	0	0	0	0
MIRA	0	0	0	0	0	0	0	0	0	1	0	0	0	1	0
MIRANDA DO CORVO	1	0	0	0	0	0	0	0	0	1	0	1	0	0	0
MIRANDA DO DOURO	1	0	0	0	0	1	0	0	0	1	0	0	1	0	0
MIRANDELA	1	0	1	0	0	0	0	0	0	1	0	0	1	0	0
MOGADOURO	1	0	0	0	0	0	0	0	0	1	0	0	1	0	0
MOIMENTA DA BEIRA	1	0	0	0	1	0	0	0	0	1	0	0	1	0	0
MOITA	0	0	0	0	0	0	0	0	1	0	0	1	0	0	0
MONÇÃO	1	0	0	0	0	1	0	0	0	1	0	0	1	0	0
MONCHIQUE	1	1	0	1	0	0	1	0	0	1	1	1	1	1	0
MONDIM DE BASTO	1	0	0	0	0	0	0	0	0	1	0	0	1	0	0
MONFORTE	1	1	0	0	1	0	0	0	1	1	1	1	1	1	0
MONTALEGRE	1	0	1	1	1	0	0	1	0	1	1	0	1	1	1
MONTEMOR-O-NOVO	1	0	0	0	0	0	0	0	0	1	0	1	1	1	0
MONTEMOR-O-VELHO	0	0	0	0	0	0	0	0	0	1	0	1	0	1	0
MONTIJO	0	0	0	1	0	0	0	0	0	1	0	1	0	0	0
MONTIJO	0	0	0	1	0	0	0	0	0	1	0	1	0	0	0
MORA	1	0	0	0	0	0	0	0	0	1	0	1	1	0	0
MORTÁGUA	0	0	0	1	0	0	1	0	0	1	0	0	0	0	0
MOURA	1	1	0	0	1	0	0	0	1	1	0	1	1	1	1
MOURÃO	1	0	0	0	1	0	0	0	0	1	0	1	1	1	0
MURÇA	1	0	1	0	0	0	0	0	0	1	0	0	1	0	0
MURTOSA	0	0	0	1	0	0	0	0	0	0	0	0	0	0	0
NAZARÉ	0	0	0	0	0	0	0	0	0	1	0	1	0	0	0
NELAS	1	0	0	0	0	0	0	0	0	1	0	0	0	0	0
NISA	1	0	0	0	0	0	0	0	0	1	0	1	1	1	0
ÓBIDOS	0	0	0	0	0	0	0	0	0	1	0	1	0	0	0
ODEMIRA	1	0	0	0	1	0	0	0	1	1	0	1	1	1	0
ODIVELAS	0	0	0	0	0	0	0	0	0	0	0	1	1	0	0
OEIRAS	0	0	0	0	0	0	0	0	0	1	0	1	0	0	0
OLEIROS	1	0	0	0	0	0	0	0	0	1	0	0	0	0	0
OLHÃO	0	1	0	1	0	0	0	0	0	1	1	1	1	0	0
OLIVEIRA DE AZEMÉIS	0	0	0	0	0	0	0	0	0	1	0	0	0	0	0
OLIVEIRA DE FRADES	1	0	0	0	0	0	0	0	0	0	0	0	0	0	0
OLIVEIRA DE FRADES	1	0	0	0	0	0	0	0	0	0	0	0	0	0	0
OLIVEIRA DO BAIRRO	0	0	0	0	0	0	0	0	0	1	0	1	0	0	0
OLIVEIRA DO HOSPITAL	1	0	0	0	0	0	0	0	0	1	0	1	0	0	0
OURIQUE	1	0	0	0	0	0	1	0	0	1	0	1	0	1	0
OVAR	1	0	0	0	0	0	0	0	0	0	0	0	0	0	0
PAÇOS DE FERREIRA	0	0	0	0	0	0	0	0	0	1	0	0	0	0	0
PALMELA	0	0	0	0	0	0	0	0	0	1	0	1	1	0	0
PAMPILHOSA DA SERRA	1	0	0	0	0	0	0	0	0	1	0	0	0	0	0
PAREDES	1	0	0	0	0	0	0	0	0	1	0	0	1	0	0
PAREDES DE COURA	1	0	1	0	0	1	0	1	0	1	1	0	1	0	0
PEDROGÃO GRANDE	1	0	0	0	0	0	0	0	0	1	0	0	0	0	0
PENACOVA	1	0	0	1	0	0	0	0	0	1	0	0	0	0	0
PENAFIEL	1	0	0	0	0	0	1	0	1	1	0	0	0	0	0
PENALVA DO CASTELO	1	0	0	0	0	0	0	0	0	1	0	0	0	0	0
PENAMACOR	1	0	0	0	0	0	0	0	0	1	1	1	1	1	0
PENEDONO	1	0	0	0	0	0	0	0	0	1	0	0	0	0	0
PENELA	1	0	0	0	0	0	0	0	0	1	0	0	0	0	0
PENICHE	0	0	1	0	0	0	0	0	0	1	0	1	0	0	0
PENICHE	0	0	1	0	0	0	0	0	0	1	0	1	0	0	0
PESO DA RÉGUA	1	0	0	0	0	0	0	0	0	1	0	0	0	0	0
PINHEL	1	0	0	0	0	0	0	1	0	1	0	0	1	0	1
POMBAL	0	0	0	0	0	0	0	0	0	1	0	0	0	0	0
PONTE DA BARCA	1	1	0	0	0	1	1	1	0	1	1	0	1	1	1
PONTE DE LIMA	1	0	1	0	0	1	0	0	0	1	1	0	1	0	0
PONTE DE SÔR	1	0	0	0	0	0	0	0	1	1	0	1	0	0	0
PORTALEGRE	1	1	0	0	1	0	1	0	1	1	1	1	1	1	0
PORTEL	1	0	0	0	1	0	1	0	1	1	0	1	1	1	1
PORTIMÃO	1	0	0	0	0	0	0	0	0	1	0	1	0	1	0
PORTO	0	0	0	0	0	0	0	0	0	1	0	0	0	0	0
PORTO DE MÓS	1	0	0	0	0	0	0	0	0	1	0	1	1	1	0
PÓVOA DE LANHOSO	1	0	0	1	0	0	0	0	1	1	0	0	1	0	0
PÓVOA DE VARZIM	0	0	0	0	0	0	0	0	0	0	0	0	0	0	0
PROENÇA-A-NOVA	1	0	0	0	0	0	0	0	0	1	0	0	0	0	0
REDONDO	1	0	0	0	0	0	0	0	0	1	0	1	1	1	1
REGUENGOS DE MONSARAZ	1	1	0	0	1	0	0	0	1	1	0	1	1	0	0
RESENDE	1	0	0	0	0	0	0	0	0	1	0	0	0	0	0
RIBEIRA DE PENA	1	0	0	0	0	0	0	0	0	1	0	0	0	0	0
RIO MAIOR	0	0	0	0	0	0	0	0	0	1	0	1	0	0	0
SABROSA	1	0	0	0	0	0	0	0	0	1	0	0	0	0	0
SABUGAL	1	0	0	0	0	0	0	0	0	1	1	1	1	1	0
SALVATERRA DE MAGOS	1	0	0	0	0	0	0	0	0	1	0	1	0	0	0
SANTA COMBA DÃO	1	0	0	0	0	0	0	1	0	1	0	0	0	0	0
SANTA MARTA DE PENAGUIÃO	0	0	0	0	0	0	0	0	0	0	0	0	0	0	0
SANTARÉM	1	0	0	0	0	0	1	0	0	1	0	1	0	0	1
SANTIAGO DO CACÉM	1	1	0	0	0	0	0	0	0	1	0	1	1	1	0
SANTO TIRSO	0	0	0	0	0	0	0	0	0	1	0	0	0	0	0
SÃO BRÁS DE ALPORTEL	0	1	0	1	0	0	1	0	0	1	1	1	1	1	0
SÃO JOÃO DA MADEIRA	0	0	0	0	0	0	0	0	0	0	0	0	0	0	0
SÃO JOÃO DA PESQUEIRA	1	0	0	0	0	0	0	0	0	1	0	0	1	0	0
SÃO PEDRO DO SUL	1	0	0	0	0	0	0	0	0	1	0	0	1	0	0
SARDOAL	1	0	0	0	0	0	0	0	0	1	0	1	0	0	0
SÁTÃO	1	0	0	0	0	0	0	0	0	1	0	0	0	0	0
SEIA	1	1	0	0	0	0	1	1	0	1	0	0	1	0	0
SEIXAL	0	0	0	0	0	0	0	0	0	0	0	1	0	0	0
SERNANCELHE	1	0	0	0	0	0	1	0	0	1	0	0	1	0	0
SERPA	1	0	0	0	1	0	0	0	0	1	0	1	1	1	0
SERTÃ	1	0	0	1	0	0	0	0	0	1	0	1	0	0	0
SESIMBRA	0	0	0	0	0	0	0	0	0	1	0	1	0	0	0
SETÚBAL	0	1	0	1	1	0	0	0	0	1	0	1	1	0	0
SEVER DO VOUGA	1	0	0	0	0	0	0	0	0	1	0	0	0	0	0
SILVES	1	0	0	0	0	0	1	0	0	1	0	1	1	1	0
SINES	0	1	0	0	0	0	0	0	0	1	0	1	0	1	0
SINTRA	0	0	0	1	0	0	0	0	1	1	0	1	0	0	0
SOBRAL DE MONTE AGRAÇO	0	0	0	0	0	0	0	0	0	0	0	1	0	0	0
SOURE	0	0	0	0	0	0	0	0	0	1	0	0	0	0	0
SOUSEL	1	0	0	0	0	0	0	0	0	1	0	1	0	0	0
TÁBUA	1	0	0	0	0	0	0	0	0	1	0	0	0	0	0
TABUAÇO	1	0	0	0	0	0	0	0	0	1	0	0	1	0	0
TAROUCA	1	0	0	1	0	0	0	0	0	1	0	1	0	0	0
TAVIRA	1	1	0	1	1	0	0	0	1	1	1	1	1	1	0
TERRAS DE BOURO	1	1	0	1	1	0	1	1	0	1	1	0	1	1	1
TOMAR	0	0	0	0	0	0	0	0	1	1	0	1	0	0	0
TONDELA	1	0	0	1	0	0	0	0	0	1	0	0	0	0	0
TORRE DE MONCORVO	1	0	0	1	0	0	0	1	0	1	0	0	1	0	1
TORRES NOVAS	1	0	0	1	0	0	0	0	0	1	1	1	0	1	0
TORRES VEDRAS	1	0	0	0	0	0	0	0	0	1	0	1	0	0	0
TRANCOSO	1	0	0	0	0	0	0	0	0	1	0	1	0	0	1
TROFA	0	0	0	0	0	0	0	0	0	1	0	0	0	0	0
VAGOS	0	0	0	0	0	0	0	0	0	1	0	0	0	1	0
VALE DE CAMBRA	1	0	0	0	0	0	0	0	0	1	0	0	0	0	0
VALENÇA	1	0	0	0	0	1	0	0	0	1	0	0	0	0	0
VALONGO	0	0	0	0	0	0	0	0	0	1	0	0	0	0	0
VALPAÇOS	1	0	0	0	0	0	0	0	0	1	0	0	0	0	0
VENDAS NOVAS	0	0	0	0	0	0	0	0	0	1	0	1	1	0	0
VIANA DO ALENTEJO	1	0	0	0	0	0	1	0	0	1	0	1	1	1	0
VIANA DO CASTELO	1	0	1	0	0	1	0	1	0	1	0	0	0	0	0
VIDIGUEIRA	1	0	0	0	1	0	0	0	0	1	0	1	1	0	0
VIEIRA DO MINHO	1	0	1	1	0	0	0	1	0	1	0	0	1	0	0
VILA DE REI	0	0	0	0	0	0	0	0	0	1	0	0	0	0	0
VILA DO BISPO	1	0	0	0	0	0	0	0	0	1	1	1	0	1	0
VILA DO CONDE	1	0	0	1	0	1	0	0	0	1	0	0	0	0	0
VILA FLOR	1	0	0	0	0	0	0	1	0	1	0	0	0	0	0
VILA FRANCA DE XIRA	0	1	0	1	0	0	0	0	0	1	0	1	1	0	0
VILA NOVA DA BARQUINHA	0	0	0	0	0	0	0	0	0	0	0	1	0	0	0
VILA NOVA DE CERVEIRA	1	0	0	0	1	1	0	1	0	1	0	0	1	0	0
VILA NOVA DE FAMALICÃO	0	0	0	0	0	0	0	0	0	1	0	0	0	0	0
VILA NOVA DE FOZ CÔA	1	0	0	0	0	0	0	0	0	1	0	0	1	0	0
VILA NOVA DE GAIA	0	0	0	1	0	0	0	0	0	1	0	0	0	0	0
VILA NOVA DE OURÉM	0	0	0	0	0	0	0	0	0	0	0	0	0	0	0
VILA NOVA DE PAIVA	1	0	0	0	0	0	0	0	0	1	0	0	0	0	0
VILA NOVA DE POIARES	1	0	0	0	0	0	0	0	0	1	0	0	0	0	0
VILA POUCA DE AGUIAR	1	0	1	0	0	0	0	1	0	1	0	0	1	0	1
VILA REAL	1	0	1	0	0	0	0	0	0	1	0	0	1	0	1
VILA REAL DE SANTO ANTÓNIO	0	0	0	0	0	0	0	0	0	1	0	1	0	0	0
VILA REAL DE SANTO ANTÓNIO	0	0	0	0	0	0	0	0	0	1	0	1	0	0	0
VILA VELHA DE RODÃO	1	0	0	0	0	0	0	0	1	1	0	1	1	0	0
VILA VERDE	1	0	0	0	1	1	0	1	0	1	0	0	1	0	0
VILA VIÇOSA	0	0	0	0	0	0	0	0	0	1	0	1	0	1	0
VIMIOSO	1	0	0	0	0	0	0	1	0	1	0	0	1	0	0
VINHAIS	1	0	1	0	1	0	1	1	1	1	0	0	1	0	1
VISEU	1	0	0	0	0	0	0	0	0	1	0	0	0	0	0
VIZELA	0	0	0	0	0	0	0	0	0	0	0	0	0	0	0
VOUZELA	1	0	0	0	0	0	0	0	0	1	0	0	0	0	0
