# Supplementary material for: Research trends and geographical distribution of mammalian carnivores in Portugal (SW Europe)
Source: PLoS One. 2018 Nov 29;13(11):e0207866. doi: 10.1371/journal.pone.0207866 (PMC6264823; doi:10.1371/journal.pone.0207866)
Supplement: S2 Dataset — (XLSX) [file pone.0207866.s004.xlsx]

## Sheet: Carnivore research and distribu
S2 Dataset - Classification of each UTM 10x10-km cell for each species into the three possible categories according to current presence records (after 2000): No records (0), Confirmed (C) and Uncorfirmed (U) presence.
Rótulos de Linha	Canis lupus	Vulpes vulpes	Mustela erminea	Mustela nivalis	Mustela putorius	Neovison vison	Martes foina	Martes martes	Meles meles	Lutra lutra	Genetta genetta	Herpestes ichneumon	Felis silvestris	Lynx pardinus	Procyon lotor
MC58	0	0	0	0	0	0	0	0	0	0	0	U	0	0	0
MC59	0	0	0	0	0	0	0	0	0	0	0	C	0	0	0
MC68	0	0	0	0	0	0	0	0	0	0	0	U	0	0	U
MC69	0	0	0	0	0	0	0	0	0	0	0	C	0	0	0
MC77	0	0	0	0	0	0	0	0	0	0	0	C	0	0	0
MC78	0	C	0	0	0	0	0	0	0	0	C	U	0	0	0
MC79	0	U	0	0	0	0	0	0	0	0	0	C	0	0	0
MC85	0	0	0	0	0	0	0	0	0	0	0	C	0	0	0
MC86	0	C	0	0	0	0	U	0	0	U	0	C	0	0	0
MC87	0	U	0	0	0	0	0	0	0	0	C	U	0	0	0
MC88	0	U	0	0	0	0	0	0	0	0	0	C	0	0	0
MC89	0	0	0	0	0	0	0	0	0	0	0	C	0	0	0
MC95	0	C	0	0	0	0	0	0	C	0	0	C	0	0	0
MC96	0	0	0	0	0	0	0	0	0	0	0	C	0	0	0
MC97	0	U	0	0	C	0	0	0	0	0	0	C	0	0	0
MC98	0	0	0	0	0	0	0	0	0	U	0	C	0	0	0
MC99	0	0	0	0	0	0	0	0	0	U	0	C	0	0	0
MD56	0	0	0	0	0	0	0	0	0	C	0	C	0	0	0
MD60	0	0	0	0	0	0	0	0	0	U	0	C	0	0	0
MD61	0	0	0	0	0	0	0	0	C	U	0	U	0	0	0
MD62	0	0	0	0	0	0	0	0	0	0	0	C	0	0	0
MD63	0	0	0	0	0	0	0	0	0	U	0	C	0	0	0
MD65	0	0	0	0	0	0	0	0	0	0	0	C	0	0	0
MD70	0	0	0	0	0	0	0	0	0	U	C	U	0	0	0
MD71	0	0	0	0	0	0	0	0	0	U	U	U	0	0	0
MD72	0	0	0	0	0	0	0	0	0	0	0	C	0	0	0
MD73	0	0	0	0	C	0	0	0	0	0	0	C	0	0	0
MD74	0	0	0	0	0	0	0	0	0	0	0	U	0	0	0
MD75	0	0	0	0	0	0	0	0	0	C	0	C	0	0	0
MD76	0	0	0	0	0	0	0	0	0	0	0	U	0	0	0
MD80	0	U	0	0	0	0	0	0	0	0	0	U	0	0	0
MD81	0	U	0	0	0	0	0	0	U	0	0	U	0	0	0
MD82	0	0	0	0	0	0	0	0	C	0	0	C	0	0	0
MD83	0	0	0	0	0	0	0	0	U	0	U	C	0	0	0
MD84	0	0	0	U	0	0	0	0	0	0	0	C	0	0	0
MD85	0	0	0	0	0	0	0	0	0	U	0	U	0	0	0
MD86	0	0	0	0	0	0	0	0	0	U	0	C	0	0	0
MD87	0	0	0	0	0	0	0	0	0	0	0	C	0	0	0
MD90	0	U	0	0	0	0	0	0	0	U	U	C	0	0	0
MD91	0	C	0	0	0	0	0	0	0	0	0	C	0	0	0
MD92	0	0	0	0	C	0	0	0	0	0	0	C	0	0	0
MD93	0	C	0	C	U	0	U	0	U	0	U	C	0	0	0
MD94	0	U	0	0	0	0	U	0	0	0	U	C	0	0	0
MD95	0	0	0	0	0	0	0	0	0	0	0	C	0	0	0
MD96	0	0	0	0	0	0	0	0	0	U	0	C	0	0	0
MD97	0	0	0	0	0	0	0	0	0	0	0	C	0	0	0
MD98	0	0	0	0	0	0	0	0	0	U	0	U	0	0	0
MD99	0	0	0	0	0	0	0	0	0	0	0	C	0	0	0
ME90	0	C	0	0	0	0	0	0	0	U	0	C	0	0	0
NA09	0	C	0	U	0	0	0	0	C	0	C	C	0	0	0
NA19	0	0	0	0	0	0	0	0	0	U	0	C	0	0	0
NA89	0	0	0	0	0	0	0	0	0	U	0	U	0	0	0
NA99	0	0	0	0	0	0	0	0	0	U	0	C	0	0	0
NB00	0	C	0	0	0	0	0	0	0	0	0	C	0	0	0
NB01	0	U	0	0	0	0	0	0	U	U	0	C	0	0	0
NB10	0	U	0	0	0	0	0	0	0	U	0	C	0	0	0
NB11	0	U	0	0	0	0	U	0	U	U	C	C	U	0	0
NB12	0	C	0	U	0	0	U	0	U	U	C	C	0	0	0
NB13	0	U	0	0	0	0	0	0	U	U	C	C	0	0	0
NB14	0	U	0	0	0	0	0	0	U	U	0	C	0	0	0
NB15	0	U	0	0	0	0	0	0	U	U	0	C	0	0	0
NB16	0	U	0	U	0	0	0	0	U	U	0	C	0	0	0
NB17	0	U	0	C	0	0	0	0	U	U	0	C	0	0	0
NB18	0	U	0	0	0	0	0	0	0	U	0	C	0	0	0
NB19	0	U	0	0	0	0	0	0	U	C	0	C	0	0	0
NB20	0	U	0	0	0	0	0	0	0	U	0	C	0	0	0
NB21	0	0	0	0	0	0	0	0	0	U	U	C	0	0	0
NB22	0	0	0	0	0	0	U	0	0	U	0	C	0	0	0
NB23	0	0	0	0	0	0	0	0	0	U	C	U	0	0	0
NB24	0	U	0	0	0	0	0	0	U	U	U	C	0	0	0
NB25	0	C	0	0	0	0	0	0	C	U	0	C	0	0	0
NB26	0	U	0	0	0	0	0	0	C	U	0	C	0	0	0
NB27	0	U	0	0	0	0	0	0	U	U	U	C	0	C	0
NB28	0	U	0	0	0	0	0	0	U	U	U	C	0	0	0
NB29	0	U	0	0	0	0	0	0	U	U	0	U	0	0	0
NB30	0	U	0	0	0	0	0	0	0	U	0	C	0	0	0
NB31	0	0	0	0	0	0	0	0	0	C	0	C	0	0	0
NB32	0	0	0	0	0	0	C	0	0	U	0	C	0	0	0
NB33	0	U	0	0	0	0	C	0	0	U	0	C	0	0	0
NB34	0	0	0	0	0	0	0	0	0	U	0	C	0	0	0
NB35	0	0	0	0	0	0	0	0	0	U	0	C	0	0	0
NB36	0	U	0	0	0	0	0	0	0	U	0	C	0	0	0
NB37	0	U	0	0	0	0	0	0	U	U	0	C	0	0	0
NB38	0	C	0	0	0	0	0	0	0	U	0	U	0	0	0
NB39	0	0	0	0	0	0	0	0	C	U	0	U	0	0	0
NB40	0	0	0	0	0	0	0	0	0	U	0	U	0	0	0
NB41	0	C	0	0	0	0	0	0	0	U	0	C	0	0	0
NB42	0	0	0	0	0	0	0	0	0	U	0	C	0	0	0
NB43	0	U	0	0	0	0	0	0	U	U	0	C	0	0	0
NB44	0	0	0	0	0	0	0	0	0	U	0	C	0	0	0
NB45	0	0	0	0	0	0	0	0	0	U	0	C	0	0	0
NB46	0	0	0	0	0	0	C	0	0	U	0	C	0	0	0
NB47	0	0	0	0	0	0	0	0	0	U	0	C	0	0	0
NB48	0	0	0	0	0	0	0	0	0	U	0	C	0	0	0
NB49	0	0	0	0	0	0	0	0	0	U	0	U	0	0	0
NB50	0	0	0	0	0	0	0	0	0	U	0	U	0	0	0
NB51	0	0	0	0	0	0	0	0	0	U	0	C	0	0	0
NB52	0	C	0	0	0	0	0	0	0	U	0	C	0	0	0
NB53	0	C	0	0	0	0	0	0	0	U	C	C	0	0	0
NB54	0	0	0	0	0	0	0	0	0	U	0	C	0	0	0
NB55	0	0	0	0	0	0	0	0	0	U	0	C	0	0	0
NB56	0	0	0	0	0	0	0	0	0	U	0	C	0	0	0
NB57	0	0	0	0	0	0	0	0	0	U	0	C	0	0	0
NB58	0	0	0	0	0	0	0	0	0	U	0	C	0	0	0
NB59	0	0	0	0	0	0	0	0	0	U	0	U	0	0	0
NB60	0	0	0	0	0	0	0	0	0	0	C	C	0	0	0
NB61	0	0	0	0	0	0	0	0	0	0	0	C	0	0	0
NB62	0	0	0	0	0	0	C	0	0	U	0	C	0	0	0
NB63	0	U	0	0	0	0	0	0	0	U	U	C	0	0	0
NB64	0	0	0	0	0	0	0	0	0	U	0	C	0	0	0
NB65	0	0	0	0	0	0	0	0	0	U	0	C	0	0	0
NB66	0	C	0	0	0	0	0	0	C	U	0	C	0	0	0
NB67	0	U	0	0	0	0	0	0	U	U	0	C	0	0	0
NB68	0	U	0	0	0	0	0	0	U	U	0	C	0	0	0
NB69	0	0	0	0	0	0	0	0	0	U	0	C	0	0	0
NB70	0	0	0	0	0	0	0	0	0	U	0	U	0	0	0
NB71	0	C	0	0	0	0	0	0	U	U	U	C	0	0	0
NB72	0	C	0	0	0	0	0	0	U	U	0	U	0	0	0
NB73	0	0	0	0	0	0	0	0	0	U	0	C	0	0	0
NB74	0	0	0	0	0	0	0	0	0	U	0	C	0	0	0
NB75	0	0	0	0	0	0	0	0	0	U	0	C	0	0	0
NB76	0	U	0	0	0	0	U	0	0	U	C	C	0	0	0
NB77	0	U	0	0	0	0	0	0	0	U	0	C	0	0	0
NB78	0	C	0	0	0	0	0	0	U	C	U	C	0	0	0
NB79	0	C	0	0	0	0	0	0	U	U	0	C	0	0	0
NB80	0	U	0	0	0	0	0	0	0	U	0	C	0	0	0
NB81	0	C	0	U	0	0	U	0	U	U	C	U	0	0	0
NB82	0	U	0	0	0	0	U	0	0	U	C	U	0	0	0
NB83	0	U	0	0	0	0	0	0	0	U	0	C	0	0	0
NB84	0	0	0	0	0	0	0	0	0	U	0	C	0	0	0
NB85	0	0	0	0	0	0	0	0	0	U	0	C	0	0	0
NB86	0	U	0	0	0	0	0	0	0	U	0	C	0	0	0
NB87	0	C	0	0	0	0	C	0	0	U	0	C	0	0	0
NB88	0	U	0	0	0	0	U	0	0	U	0	C	0	0	0
NB89	0	0	0	0	0	0	0	0	0	U	0	C	0	0	0
NB90	0	C	0	0	0	0	0	0	0	0	C	C	0	0	0
NB91	0	U	0	0	0	0	U	0	0	U	U	U	0	0	0
NB92	0	U	0	0	0	0	0	0	0	U	0	U	0	0	0
NB93	0	U	0	0	0	0	0	0	0	U	U	U	0	0	0
NB94	0	C	0	0	0	0	0	0	0	U	0	C	0	0	0
NB95	0	0	0	0	0	0	0	0	0	U	0	C	0	0	0
NB96	0	U	0	0	0	0	0	0	0	U	0	C	0	0	0
NB97	0	U	0	0	0	0	U	0	0	U	0	C	0	0	0
NB98	0	C	0	0	0	0	U	0	0	C	U	C	0	0	0
NB99	0	0	0	0	0	0	0	0	0	U	0	C	0	0	0
NC05	0	C	0	0	0	0	0	0	0	0	0	U	0	0	0
NC06	0	C	0	0	0	0	0	0	0	U	C	C	0	C	0
NC07	0	0	0	0	0	0	0	0	0	0	0	C	0	0	0
NC08	0	0	0	0	0	0	0	0	C	C	0	C	0	0	0
NC09	0	C	0	0	0	0	0	0	C	U	C	C	0	0	0
NC10	0	U	0	U	0	0	0	0	U	U	0	C	0	0	0
NC11	0	U	0	0	0	0	0	0	U	U	0	C	0	0	0
NC12	0	0	0	0	0	0	0	0	0	U	0	U	0	0	0
NC13	0	U	0	0	0	0	0	0	0	U	0	U	0	0	0
NC14	0	0	0	0	0	0	0	0	0	U	0	C	0	0	0
NC15	0	U	0	0	0	0	0	0	U	U	0	C	0	0	0
NC16	0	0	0	0	0	0	0	0	0	C	0	U	0	0	0
NC17	0	0	0	0	0	0	0	0	0	0	0	C	0	0	0
NC18	0	0	0	0	0	0	0	0	0	U	0	C	0	0	0
NC19	0	C	0	0	0	0	0	0	C	C	0	C	C	0	0
NC20	0	U	0	0	0	0	U	0	0	U	0	U	0	0	0
NC21	0	0	0	0	0	0	0	0	0	U	0	C	0	0	0
NC22	0	U	0	0	0	0	0	0	U	U	0	C	0	0	0
NC23	0	U	0	0	0	0	0	0	C	U	0	U	0	0	0
NC24	0	U	0	0	0	0	0	0	U	U	0	C	0	0	0
NC25	0	0	0	0	0	0	0	0	U	C	0	C	0	0	0
NC26	0	0	0	0	0	0	0	0	U	C	0	C	0	0	0
NC27	0	0	0	0	0	0	0	0	0	U	C	C	0	0	0
NC28	0	0	0	0	0	0	0	0	0	0	0	C	0	0	0
NC29	0	0	0	U	0	0	0	0	0	U	0	C	0	0	0
NC30	0	0	0	0	0	0	0	0	0	U	0	U	0	0	0
NC31	0	C	0	U	0	0	U	0	C	U	U	C	0	0	0
NC32	0	U	0	0	0	0	0	0	C	U	0	C	0	0	0
NC33	0	0	0	0	0	0	0	0	0	U	0	U	0	0	0
NC34	0	0	0	0	0	0	0	0	0	U	0	C	0	0	0
NC35	0	0	0	0	0	0	0	0	C	C	0	C	0	0	0
NC36	0	U	0	0	0	0	0	0	C	U	U	C	0	0	0
NC37	0	C	0	0	0	0	0	0	0	U	0	C	0	0	0
NC38	0	C	0	0	0	0	C	0	0	U	0	C	0	0	0
NC39	0	0	0	0	0	0	0	0	0	U	0	C	0	0	0
NC40	0	0	0	0	0	0	0	0	0	U	0	U	0	0	0
NC41	0	0	0	0	0	0	0	0	U	U	0	U	0	0	0
NC42	0	0	0	0	0	0	0	0	0	U	0	U	0	0	0
NC43	0	0	0	0	0	0	0	0	0	U	0	C	0	0	0
NC44	0	0	0	0	0	0	0	0	0	U	C	C	0	0	0
NC45	0	0	0	0	0	0	0	0	0	U	0	C	0	0	0
NC46	0	U	0	0	U	0	0	0	U	U	0	C	0	0	0
NC47	0	C	0	0	C	0	0	0	0	U	0	C	0	0	0
NC48	0	C	0	0	0	0	0	0	0	U	0	C	0	0	0
NC49	0	0	0	0	0	0	0	0	0	U	0	C	0	0	0
NC50	0	0	0	0	0	0	0	0	0	U	0	U	0	0	0
NC51	0	0	0	0	0	0	0	0	0	U	0	U	0	0	0
NC52	0	0	0	0	0	0	0	0	0	U	0	U	0	0	0
NC53	0	0	0	0	C	0	0	0	0	U	C	C	0	0	0
NC54	0	U	0	0	0	0	0	0	U	U	0	C	0	0	0
NC55	0	0	0	0	0	0	0	0	C	U	0	C	0	0	0
NC56	0	0	0	0	0	0	0	0	0	U	0	C	0	0	0
NC57	0	0	0	0	0	0	0	0	0	U	0	C	0	0	0
NC58	0	0	0	0	0	0	0	0	0	U	0	C	0	0	0
NC59	0	0	0	0	0	0	0	0	0	U	C	C	0	0	0
NC60	0	0	0	0	0	0	0	0	0	U	0	C	0	0	0
NC61	0	0	0	0	0	0	0	0	U	U	0	U	0	0	0
NC62	0	0	0	0	0	0	0	0	0	U	0	U	0	0	0
NC63	0	0	0	0	0	0	C	0	0	U	0	C	0	0	0
NC64	0	0	0	0	0	0	0	0	0	U	0	C	0	0	0
NC65	0	0	0	0	0	0	0	0	0	U	0	C	0	0	0
NC66	0	U	0	U	0	0	U	0	U	C	C	C	0	0	0
NC67	0	C	0	U	U	0	C	0	C	U	C	C	0	0	0
NC68	0	0	0	0	0	0	0	0	0	U	0	C	0	0	0
NC69	0	0	0	0	0	0	C	0	0	U	C	C	0	0	0
NC70	0	0	0	0	0	0	0	0	0	U	0	U	0	0	0
NC71	0	0	0	0	0	0	0	0	0	U	C	U	0	0	0
NC72	0	0	0	0	0	0	0	0	0	U	0	U	0	0	0
NC73	0	0	0	0	0	0	0	0	0	U	0	C	0	0	0
NC74	0	C	0	0	0	0	0	0	0	U	0	C	0	0	0
NC75	0	C	0	U	0	0	U	0	U	U	U	C	0	0	0
NC76	0	C	0	U	C	0	C	0	C	C	C	C	0	0	0
NC77	0	C	0	U	U	0	C	0	C	C	C	C	0	0	0
NC78	0	C	0	0	C	0	C	0	C	U	C	C	0	0	0
NC79	0	0	0	0	0	0	C	0	0	U	0	C	0	0	0
NC80	0	0	0	U	0	0	0	0	0	U	0	C	0	0	0
NC81	0	0	0	0	0	0	0	0	U	U	0	C	0	0	0
NC82	0	0	0	0	0	0	0	0	0	C	0	U	0	0	0
NC83	0	0	0	0	0	0	0	0	0	U	0	U	0	0	0
NC84	0	0	0	0	0	0	0	0	0	U	0	C	0	0	0
NC85	0	0	0	0	0	0	C	0	0	U	C	C	0	0	0
NC86	0	U	0	C	0	0	C	0	U	C	C	C	0	0	0
NC87	0	U	0	C	C	0	C	0	U	U	C	C	0	0	0
NC88	0	U	0	C	U	0	U	0	U	U	C	C	0	0	0
NC89	0	0	0	0	0	0	0	0	0	U	0	C	0	0	0
NC90	0	0	0	0	0	0	0	0	0	U	0	C	0	0	0
NC91	0	0	0	0	0	0	0	0	C	U	0	C	0	0	0
NC92	0	0	0	0	0	0	0	0	0	0	0	C	0	0	0
NC93	0	0	0	0	0	0	0	0	0	U	0	C	0	0	0
NC94	0	0	0	0	0	0	0	0	0	U	0	U	0	0	0
NC95	0	0	0	0	0	0	0	0	0	U	0	C	0	0	0
NC96	0	0	0	0	0	0	0	0	0	U	C	C	0	0	0
NC97	0	C	0	0	0	0	0	0	0	U	C	C	0	0	0
NC98	0	0	0	0	0	0	0	0	0	U	0	C	0	0	0
NC99	0	0	0	0	0	0	0	0	0	U	0	C	0	0	0
ND00	0	C	0	0	0	0	0	0	C	U	0	C	C	0	0
ND01	0	0	0	0	0	0	0	0	0	U	0	C	0	0	0
ND02	0	U	0	U	U	0	U	0	C	C	U	C	U	0	0
ND03	0	C	0	0	C	0	0	0	C	0	C	C	0	0	0
ND04	0	C	0	0	C	0	0	0	U	U	0	C	0	0	0
ND05	0	0	0	0	0	0	0	0	0	0	C	C	0	0	0
ND06	0	C	0	0	0	0	0	0	C	0	0	C	0	0	0
ND07	0	0	0	0	0	0	0	0	0	U	0	C	0	0	0
ND08	0	0	0	0	0	0	0	0	0	U	0	C	0	0	0
ND09	0	C	0	0	0	0	0	0	0	U	0	C	0	0	0
ND10	0	0	0	0	0	0	0	0	0	U	0	U	0	0	0
ND11	0	C	0	0	0	0	U	0	0	C	0	C	0	0	0
ND12	0	0	0	0	0	0	0	0	0	U	0	C	0	0	0
ND13	0	0	0	0	0	0	0	0	0	0	0	U	0	0	0
ND14	0	0	0	0	0	0	0	0	0	U	0	U	0	0	0
ND15	0	0	0	0	0	0	0	0	0	0	0	U	0	0	0
ND16	0	U	0	C	0	0	0	0	C	0	C	C	0	0	0
ND17	0	C	0	C	0	0	0	0	C	0	0	U	0	0	0
ND18	0	C	0	0	0	0	0	0	0	U	0	U	0	0	0
ND19	0	0	0	0	0	0	0	0	0	U	0	C	0	0	0
ND20	0	0	0	0	0	0	0	0	0	U	0	C	0	0	0
ND21	0	0	0	0	0	0	0	0	C	U	0	C	0	0	0
ND22	0	0	0	0	0	0	0	0	0	U	0	C	0	0	0
ND23	0	0	0	0	0	0	0	0	0	0	0	U	0	0	U
ND24	0	0	0	0	0	0	U	0	C	U	0	C	0	0	0
ND25	0	0	0	0	0	0	0	0	0	0	0	U	0	0	0
ND26	0	0	0	0	0	0	0	0	0	0	0	C	0	0	0
ND27	0	0	0	U	0	0	0	0	0	0	C	C	0	0	0
ND28	0	C	0	0	0	0	0	0	0	0	0	C	0	0	0
ND29	0	0	0	0	0	0	0	0	0	U	0	C	0	0	0
ND30	0	0	0	0	0	0	0	0	0	U	0	C	0	0	0
ND31	0	0	0	0	0	0	0	0	0	U	0	C	0	0	0
ND32	0	0	0	0	0	0	0	0	0	U	0	C	0	0	0
ND33	0	0	0	0	0	0	0	0	0	U	0	C	0	0	0
ND34	0	0	0	0	0	0	0	0	0	U	0	C	0	0	0
ND35	0	0	0	0	0	0	0	0	0	U	0	U	0	0	0
ND36	0	0	0	0	0	0	0	0	0	0	0	C	0	0	0
ND37	0	U	0	0	0	0	0	0	0	U	0	U	0	0	0
ND38	0	C	0	0	0	0	0	0	0	U	0	C	0	0	0
ND39	0	0	0	0	0	0	0	0	0	U	0	C	0	0	0
ND40	0	0	0	C	0	0	0	0	0	U	0	C	0	0	0
ND41	0	0	0	0	0	0	0	0	C	U	0	C	0	0	0
ND42	0	0	0	0	0	0	0	0	0	U	0	C	0	0	0
ND43	0	0	0	0	0	0	0	0	0	U	0	C	0	0	0
ND44	0	0	0	0	0	0	0	0	0	U	0	U	0	0	0
ND45	0	C	0	0	U	0	0	0	C	U	0	C	0	0	0
ND46	0	0	0	0	0	0	0	0	0	C	0	U	0	0	0
ND47	0	0	0	0	0	0	0	0	0	0	0	U	0	0	0
ND48	0	C	0	0	0	0	0	0	C	U	0	C	0	0	0
ND49	0	0	0	0	0	0	0	0	0	U	0	C	0	0	0
ND50	0	0	0	0	0	0	0	0	0	U	0	C	0	0	0
ND51	0	0	0	0	0	0	0	0	0	U	0	C	0	0	0
ND52	0	0	0	0	0	0	0	0	0	U	0	C	0	0	0
ND53	0	0	0	0	0	0	0	0	0	U	0	U	0	0	0
ND54	0	0	0	0	0	0	0	0	0	U	0	U	0	0	0
ND55	0	0	0	0	0	0	0	0	0	U	0	U	0	0	0
ND56	0	U	0	0	0	0	0	0	0	U	C	U	0	0	0
ND57	0	0	0	0	C	0	0	0	0	C	0	C	0	0	0
ND58	0	0	0	0	0	0	C	0	0	U	0	C	0	0	0
ND59	0	0	0	0	0	0	0	0	0	U	0	C	0	0	0
ND60	0	0	0	0	0	0	0	0	0	U	0	C	0	0	0
ND61	0	C	0	0	0	0	0	0	0	U	0	C	0	0	0
ND62	0	C	0	C	0	0	0	0	0	U	0	C	0	0	0
ND63	0	0	0	0	0	0	0	0	0	U	0	C	0	0	0
ND64	0	0	0	0	0	0	0	0	0	U	0	U	0	0	0
ND65	0	0	0	0	0	0	0	0	0	U	0	C	0	0	0
ND66	0	0	0	0	0	0	0	0	0	U	0	C	0	0	0
ND67	0	0	0	0	0	0	0	0	0	U	0	C	0	0	0
ND68	0	0	0	0	0	0	0	0	0	U	0	C	0	0	0
ND69	0	0	0	0	0	0	0	0	0	U	0	C	0	0	0
ND70	0	0	0	0	0	0	0	0	0	U	0	C	0	0	0
ND71	0	0	0	0	0	0	0	0	0	U	0	C	0	0	0
ND72	0	0	0	0	0	0	0	0	0	U	0	C	0	0	0
ND73	0	0	0	0	0	0	0	0	0	U	0	C	0	0	0
ND74	0	0	0	0	0	0	0	0	0	U	0	C	0	0	0
ND75	0	0	0	0	0	0	0	0	0	U	0	C	0	0	0
ND76	0	0	0	0	0	0	0	0	0	U	0	C	0	0	0
ND77	0	U	0	0	0	0	0	0	0	U	C	U	0	0	0
ND78	0	C	0	0	0	0	0	0	0	U	0	U	0	0	0
ND79	0	0	0	0	0	0	0	0	0	U	0	C	0	0	0
ND80	0	0	0	0	0	0	0	0	0	U	0	C	0	0	0
ND81	0	0	0	0	0	0	0	0	0	C	0	C	0	0	0
ND82	0	0	0	0	0	0	0	0	0	U	0	C	0	0	0
ND83	0	0	0	0	0	0	0	0	C	U	0	C	0	0	0
ND84	0	0	0	0	0	0	0	0	0	U	0	C	0	0	0
ND85	0	C	0	0	0	0	0	0	0	U	0	C	0	0	0
ND86	0	U	0	0	0	0	0	0	U	U	0	C	0	0	0
ND87	0	0	0	0	0	0	0	0	0	U	0	C	0	0	0
ND88	0	U	0	0	0	0	0	0	0	U	0	C	0	0	0
ND89	0	0	0	0	0	0	0	0	0	U	0	C	0	0	0
ND90	0	0	0	0	0	0	0	0	0	U	0	C	0	0	0
ND91	0	0	0	0	0	0	0	0	0	U	0	C	0	0	0
ND92	0	0	0	0	0	0	0	0	0	U	0	C	0	0	0
ND93	0	0	0	0	0	0	0	0	0	U	0	C	0	0	0
ND94	0	0	0	0	0	0	0	0	0	U	0	C	0	0	0
ND95	0	0	0	0	0	0	0	0	0	U	0	C	0	0	0
ND96	0	0	0	0	0	0	0	0	0	U	0	C	0	0	0
ND97	0	0	0	0	0	0	0	0	0	U	0	C	0	0	0
ND98	0	0	0	0	0	0	0	0	0	U	0	C	0	0	0
ND99	0	0	0	0	0	0	0	0	0	U	0	C	0	0	0
NE00	0	0	0	0	0	0	0	0	0	U	0	C	0	0	0
NE01	0	0	0	0	0	0	0	0	0	U	0	C	0	0	0
NE02	0	0	0	0	0	0	0	0	0	0	0	C	0	0	0
NE03	0	0	0	0	0	0	0	0	0	0	0	C	0	0	0
NE04	0	0	0	0	0	0	0	0	0	0	0	C	0	0	0
NE05	0	0	0	0	0	0	0	0	0	0	0	C	0	0	0
NE10	0	0	0	0	0	0	0	0	0	U	0	C	0	0	0
NE11	0	0	0	0	0	0	0	0	0	U	0	C	0	0	0
NE12	0	0	0	0	0	0	0	0	0	C	0	C	0	0	0
NE13	0	0	0	0	0	0	0	0	0	U	0	C	0	0	0
NE14	0	0	0	0	0	0	0	0	0	U	0	C	0	0	0
NE15	0	0	0	0	0	0	0	0	0	U	0	C	0	0	0
NE16	0	0	0	0	0	0	0	0	0	U	0	C	0	0	0
NE17	0	0	0	0	0	0	0	0	0	U	0	U	0	0	0
NE18	0	0	0	0	0	0	0	0	0	U	0	U	0	0	0
NE19	0	0	0	0	0	0	0	0	0	U	0	C	0	0	0
NE20	0	0	0	0	0	0	0	0	0	U	0	C	0	0	0
NE21	0	0	0	0	0	0	0	0	0	U	0	C	0	0	0
NE22	0	0	0	0	0	0	0	0	0	U	0	C	0	0	0
NE23	0	0	0	0	0	0	0	0	0	U	0	U	0	0	0
NE24	0	0	0	C	0	0	0	0	0	C	0	U	0	0	0
NE25	0	0	0	0	0	0	0	0	0	U	0	U	0	0	0
NE26	0	0	0	0	0	0	0	0	0	U	0	C	0	0	0
NE27	0	0	0	0	0	0	0	0	0	U	0	U	0	0	0
NE28	0	0	0	0	0	0	0	0	0	U	0	C	0	0	0
NE29	0	0	0	0	0	0	0	0	0	U	0	C	0	0	0
NE30	0	0	0	0	0	0	0	0	0	U	0	C	0	0	0
NE31	0	0	0	0	0	0	0	0	0	U	0	C	0	0	0
NE32	0	0	0	0	0	0	0	0	0	U	0	C	0	0	0
NE33	0	0	0	0	0	0	0	0	0	C	0	U	0	0	0
NE34	0	0	0	0	0	0	0	0	0	U	0	U	0	0	0
NE35	0	0	0	0	0	0	0	0	0	U	0	U	0	0	0
NE36	0	0	0	0	0	0	0	0	0	U	0	C	0	0	0
NE37	0	C	0	0	0	0	0	0	0	U	0	C	0	0	0
NE38	0	0	0	0	0	0	0	0	0	U	0	C	0	0	0
NE39	0	0	0	0	0	0	0	0	0	U	0	C	0	0	0
NE40	0	U	0	0	0	0	C	0	0	U	U	C	0	0	0
NE41	0	0	0	0	0	0	0	0	0	0	0	C	0	0	0
NE42	0	0	0	0	0	0	0	0	0	0	0	C	0	0	0
NE43	0	0	0	0	0	0	0	0	0	0	0	U	0	0	0
NE44	0	0	0	0	0	0	0	0	0	U	0	C	0	0	0
NE45	0	0	0	0	0	0	0	0	C	U	C	C	0	0	0
NE46	0	C	0	C	0	0	0	0	C	U	0	C	0	0	0
NE47	0	C	0	0	0	0	0	0	C	U	C	C	0	0	0
NE48	0	C	0	0	0	0	0	0	0	U	C	C	0	0	0
NE49	0	C	0	0	0	0	0	0	0	U	0	U	0	0	0
NE50	0	0	0	0	0	0	0	0	0	0	0	C	0	0	0
NE51	0	U	0	0	0	0	0	0	0	U	0	C	0	0	0
NE52	0	0	0	0	0	0	0	0	0	U	0	C	0	0	0
NE53	0	0	0	0	0	0	0	0	0	U	0	U	0	0	0
NE54	0	0	0	0	0	0	0	0	0	U	C	U	0	0	0
NE55	0	U	0	0	0	0	0	0	C	C	0	C	0	0	0
NE56	0	0	0	U	0	0	C	0	C	U	C	C	0	0	0
NE57	0	C	0	0	0	0	0	0	0	U	0	C	0	0	0
NE58	0	0	0	0	0	0	0	0	0	U	0	U	0	0	0
NE59	0	0	0	0	0	0	0	0	0	U	0	U	0	0	0
NE60	0	0	0	0	0	0	0	0	0	U	0	U	0	0	0
NE61	0	0	0	0	0	0	0	0	0	U	C	C	0	0	0
NE62	0	0	0	0	0	0	0	0	0	U	0	C	0	0	0
NE63	0	U	0	0	0	0	0	0	0	U	0	C	0	0	0
NE64	0	0	0	0	0	0	0	0	0	U	0	C	0	0	0
NE65	0	0	0	0	0	0	U	0	0	U	C	U	0	0	0
NE66	0	0	0	0	0	0	0	0	0	U	C	C	0	0	0
NE67	0	0	0	0	0	0	0	0	0	U	C	C	0	0	0
NE68	0	0	0	0	0	0	0	0	0	U	0	C	0	0	0
NE69	0	0	0	0	0	0	0	0	0	U	0	C	0	0	0
NE70	0	C	0	0	0	0	0	0	0	U	0	U	0	0	0
NE71	0	0	0	0	0	0	C	0	0	U	0	U	0	0	0
NE72	0	0	0	0	0	0	0	0	0	U	0	U	0	0	0
NE73	0	U	0	0	0	0	0	0	U	U	0	U	0	0	0
NE74	0	C	0	0	0	0	0	0	0	U	0	U	0	0	0
NE75	0	C	0	0	0	0	0	0	0	U	U	U	0	0	0
NE76	0	C	0	0	0	0	C	0	0	U	C	C	0	0	0
NE77	0	0	0	0	0	0	C	0	0	U	0	U	0	0	0
NE78	0	0	0	0	0	0	0	0	0	U	0	C	0	0	0
NE79	0	0	0	0	0	0	0	0	0	U	0	C	0	0	0
NE80	0	C	0	0	0	0	0	0	0	U	0	U	0	0	0
NE81	0	0	0	0	0	0	0	0	0	U	0	U	0	0	0
NE82	0	0	0	0	0	0	0	U	0	U	0	C	0	0	0
NE83	0	0	0	0	0	0	0	U	0	U	0	C	0	0	0
NE84	0	U	0	0	0	0	U	U	C	U	U	U	0	0	0
NE85	0	C	0	0	0	0	C	0	C	U	C	C	0	0	0
NE86	0	C	0	0	0	0	0	0	0	U	0	C	0	0	0
NE87	0	C	0	0	0	0	0	0	0	U	0	C	0	0	0
NE88	0	C	0	0	0	0	C	0	0	U	0	C	0	0	0
NE89	0	C	0	0	0	0	C	0	0	U	0	U	0	0	0
NE90	0	0	0	0	0	0	0	0	0	U	0	C	0	0	0
NE91	0	0	0	0	0	0	0	0	0	U	0	C	0	0	0
NE92	0	0	0	0	0	0	0	U	0	U	0	C	0	0	0
NE93	0	0	0	0	0	0	0	U	0	U	0	C	0	0	0
NE94	U	C	0	U	0	0	C	U	0	C	U	C	0	0	0
NE95	0	C	0	U	U	0	C	0	U	U	0	C	0	0	0
NE96	0	C	0	0	0	0	0	0	0	C	U	C	0	0	0
NE97	0	C	0	U	0	0	0	0	0	U	0	C	0	0	0
NE98	0	0	0	0	0	0	0	0	0	U	0	U	0	0	0
NE99	0	0	0	0	0	0	0	0	0	U	0	U	0	0	0
NF17	0	0	0	0	0	0	0	0	0	U	0	0	0	0	0
NF18	0	0	0	0	0	0	0	0	0	0	0	0	0	0	0
NF19	0	0	0	0	0	C	0	0	0	C	0	0	C	0	C
NF20	0	C	0	0	0	0	0	0	0	U	C	C	0	0	0
NF21	0	0	U	0	0	0	0	0	0	0	C	U	0	0	0
NF22	0	0	0	0	0	0	0	0	0	0	0	U	0	0	0
NF23	0	0	0	0	0	0	0	0	0	0	0	U	0	0	0
NF24	0	0	0	0	0	0	0	0	0	0	0	0	0	0	0
NF25	0	0	0	0	0	0	0	0	0	U	0	0	0	0	0
NF26	0	0	0	0	0	0	0	0	0	U	0	C	0	0	0
NF27	0	C	0	C	0	U	0	0	0	U	U	0	0	0	0
NF28	0	0	0	0	0	0	0	0	C	U	C	0	0	0	0
NF29	0	0	0	0	0	U	0	U	0	U	0	0	0	0	0
NF30	0	0	0	0	0	0	0	0	0	U	0	U	0	0	0
NF31	0	0	0	0	0	0	0	0	0	U	0	U	0	0	0
NF32	0	0	0	0	0	0	0	0	0	0	0	U	0	0	0
NF33	0	0	0	0	0	0	0	0	0	0	0	0	0	0	0
NF34	0	0	0	C	0	0	0	U	0	0	C	0	0	0	0
NF35	0	0	0	C	0	0	0	0	0	U	C	0	0	0	0
NF36	0	0	0	0	0	0	0	0	0	U	C	C	0	0	0
NF37	0	C	0	0	0	U	0	0	0	U	C	0	0	0	0
NF38	0	0	0	0	0	0	0	U	0	C	0	0	0	0	C
NF39	0	0	0	0	0	U	0	U	0	U	C	0	0	0	0
NF40	0	0	0	0	0	0	0	U	0	U	0	U	0	0	0
NF41	0	0	0	0	0	0	0	0	0	U	0	U	0	0	0
NF42	0	0	0	0	0	0	0	0	0	U	0	U	0	0	0
NF43	0	C	0	0	0	0	0	0	0	U	0	0	0	0	0
NF44	0	C	0	0	0	0	0	0	0	U	0	0	0	0	0
NF45	0	C	0	0	0	C	U	0	C	U	0	0	0	0	0
NF46	0	0	0	0	0	0	0	U	0	U	0	0	0	0	0
NF47	0	0	0	0	0	U	C	0	0	U	C	0	0	0	0
NF48	0	0	0	0	0	C	0	U	0	U	0	0	0	0	0
NF49	0	0	0	0	0	0	0	0	0	U	0	0	0	0	0
NF50	0	0	0	0	0	0	0	U	0	U	0	U	0	0	0
NF51	0	0	0	0	0	0	0	0	0	U	0	C	0	0	0
NF52	0	0	0	0	0	0	0	U	0	U	0	C	0	0	0
NF53	0	0	0	0	0	0	0	U	0	U	0	0	0	0	0
NF54	0	0	0	0	0	0	0	0	0	U	0	0	0	0	0
NF55	0	0	0	0	0	0	0	0	0	U	0	0	0	0	0
NF56	U	0	0	0	0	U	0	0	0	U	C	0	0	0	0
NF57	0	0	0	0	0	0	0	0	0	U	0	0	0	0	0
NF58	0	0	0	0	0	0	0	0	0	0	0	0	0	0	0
NF59	0	0	0	0	0	0	0	0	0	U	0	0	0	0	0
NF60	0	0	0	0	0	0	0	0	0	U	0	U	0	0	0
NF61	C	0	0	0	0	0	0	0	0	U	0	C	0	0	0
NF62	C	0	0	0	0	0	0	0	0	U	0	0	0	0	0
NF63	U	U	0	U	0	0	U	U	0	U	0	0	0	0	0
NF64	0	0	0	0	0	0	0	U	0	U	0	U	0	0	0
NF65	0	0	0	0	0	0	0	U	0	U	0	0	0	0	0
NF66	0	0	0	0	0	0	0	0	0	U	0	0	0	0	0
NF67	0	0	0	0	0	0	0	U	0	U	0	0	0	0	0
NF68	0	U	0	0	0	0	0	U	0	U	0	0	U	0	0
NF69	0	0	0	0	0	0	0	U	0	U	0	0	0	0	0
NF70	0	0	0	0	0	0	0	0	0	U	0	U	0	0	0
NF71	U	C	0	0	0	0	0	U	0	U	0	C	0	0	0
NF72	C	C	0	0	0	0	C	U	U	U	C	C	0	0	0
NF73	C	0	0	0	0	0	0	U	0	U	0	C	0	0	0
NF74	C	0	0	0	0	0	0	U	0	U	0	U	0	0	0
NF75	0	0	0	0	0	0	0	U	0	U	0	0	0	0	0
NF76	U	0	C	0	0	0	0	0	0	U	0	U	0	0	0
NF77	0	0	0	0	0	0	0	0	0	U	0	U	0	0	0
NF78	0	C	0	0	0	0	0	U	0	U	0	0	0	0	0
NF79	U	C	0	0	0	0	0	0	0	U	0	0	0	0	0
NF80	0	0	0	0	0	0	0	0	0	U	0	U	0	0	0
NF81	U	C	0	0	0	0	0	U	0	U	0	C	0	0	0
NF82	C	C	0	0	0	0	0	0	0	U	0	C	0	0	0
NF83	C	0	0	0	0	0	C	0	U	U	0	C	0	0	0
NF84	C	0	0	0	0	0	0	0	0	U	0	U	0	0	0
NF85	0	0	0	0	0	0	C	U	0	U	0	0	0	0	0
NF86	U	C	0	0	0	0	0	0	0	U	0	U	0	0	0
NF87	U	0	0	U	0	0	0	0	0	U	0	U	0	0	0
NF88	U	U	0	0	0	0	0	U	0	U	0	0	0	0	0
NF89	U	0	0	0	0	0	0	0	0	U	0	0	0	0	0
NF90	0	0	0	0	0	0	C	0	0	U	0	U	0	0	0
NF91	0	0	0	0	0	0	0	U	0	U	0	U	0	0	0
NF92	U	C	0	0	0	0	0	U	0	U	0	C	0	0	0
NF93	C	C	0	0	0	0	0	U	U	U	C	C	0	0	0
NF94	C	U	C	0	0	0	C	0	U	U	0	C	0	0	0
NF95	0	C	0	0	0	0	0	U	0	U	0	C	0	0	0
NF96	U	0	0	0	0	0	0	0	0	U	0	0	0	0	0
NF97	C	U	0	C	0	0	0	0	0	U	0	C	0	0	0
NF98	U	C	U	0	0	0	C	0	0	U	0	0	U	0	0
NF99	U	0	0	0	0	0	C	0	0	C	0	0	0	0	0
NG10	0	0	0	0	0	0	0	0	0	U	C	0	0	0	0
NG11	C	C	0	0	U	C	0	0	0	U	0	0	0	0	0
NG12	C	0	0	0	0	U	0	0	0	U	C	0	0	0	0
NG13	C	0	0	0	0	C	0	U	0	U	0	0	0	0	0
NG14	U	0	0	0	0	C	0	0	0	U	0	0	0	0	0
NG20	0	0	0	0	0	0	0	0	0	U	0	0	0	0	0
NG21	C	0	0	0	0	U	0	0	0	U	0	0	0	0	0
NG22	C	0	0	0	U	U	0	0	0	U	C	0	U	0	0
NG23	C	0	0	0	0	0	0	U	0	U	U	0	0	0	0
NG24	C	0	0	0	0	C	0	U	0	U	0	0	0	0	0
NG25	U	0	0	0	0	U	C	U	0	U	0	0	0	0	0
NG30	0	0	0	0	0	U	0	U	0	U	0	0	0	0	0
NG31	0	0	0	0	0	U	0	U	0	U	0	0	0	0	0
NG32	C	0	0	0	U	C	0	0	C	U	0	0	0	0	0
NG33	C	C	0	0	0	0	0	0	0	U	C	0	C	0	0
NG34	C	C	0	0	C	0	0	U	0	U	0	0	C	0	0
NG35	C	C	0	0	0	U	0	U	0	U	C	0	0	0	0
NG40	0	0	0	0	0	C	0	0	0	U	0	0	0	0	0
NG41	U	0	0	0	0	C	0	0	0	U	0	0	0	0	0
NG42	C	0	0	0	0	C	0	0	0	U	C	0	0	0	0
NG43	C	0	0	0	0	0	0	0	0	U	C	0	0	0	0
NG44	C	C	0	0	0	U	0	U	0	U	C	0	0	0	0
NG45	C	C	0	0	0	U	0	U	0	U	C	0	0	0	0
NG50	U	0	0	0	0	C	0	0	0	U	0	0	0	0	0
NG51	C	0	0	0	0	0	0	0	0	U	0	0	0	0	0
NG52	C	0	0	0	0	C	0	0	0	U	0	0	0	0	0
NG53	C	C	0	0	0	U	0	U	0	U	C	0	0	0	0
NG54	C	C	0	0	0	0	C	C	0	U	0	0	C	0	0
NG55	C	C	0	0	0	0	0	0	0	U	C	0	C	0	0
NG56	U	0	0	0	0	U	0	0	0	U	0	0	0	0	0
NG60	U	0	0	0	0	C	0	U	0	U	C	0	0	0	0
NG61	U	C	0	0	0	C	C	U	0	U	0	0	0	0	0
NG62	C	0	U	0	0	0	0	U	0	U	0	0	0	0	0
NG63	C	0	0	0	0	U	C	U	0	U	0	0	C	0	0
NG64	C	C	0	0	0	0	C	U	U	U	0	0	C	0	0
NG65	C	C	C	C	0	C	C	0	C	U	C	0	C	0	0
NG66	C	0	0	0	0	0	0	0	0	U	0	0	0	0	0
NG70	C	0	0	0	0	0	0	0	0	U	0	0	0	0	0
NG71	C	0	0	0	0	0	0	0	0	U	0	0	0	0	0
NG72	C	C	0	C	U	U	C	C	0	U	0	0	C	0	0
NG73	U	C	0	0	0	0	0	U	0	U	0	0	0	0	0
NG74	U	0	0	0	0	0	0	U	0	U	0	0	0	0	0
NG75	C	C	0	0	0	0	0	0	0	U	0	0	0	0	0
NG80	C	0	0	0	0	0	0	0	0	U	0	0	0	0	0
NG81	U	C	0	0	C	0	0	0	0	U	0	0	0	0	0
NG82	U	0	0	0	0	0	0	0	0	U	0	0	0	0	0
NG83	C	C	0	C	0	0	0	C	U	U	C	0	0	0	0
NG90	U	0	0	0	0	0	0	0	0	U	0	0	0	0	0
NG91	U	0	C	0	C	0	0	0	0	U	0	0	0	0	0
NG92	U	C	0	0	C	C	0	U	C	U	0	0	U	0	0
NG93	C	C	U	C	0	0	0	C	C	U	0	0	C	0	0
NG94	U	0	0	0	0	0	0	0	0	U	0	0	0	0	0
PA09	0	C	0	0	0	0	0	0	C	C	0	U	0	0	0
PA19	0	0	0	0	0	0	0	0	0	0	0	U	0	0	0
PB00	0	0	0	0	0	0	0	0	0	U	C	U	0	0	0
PB01	0	U	0	0	0	0	U	0	0	U	U	C	0	0	0
PB02	0	U	0	U	U	0	U	0	U	U	U	C	0	0	0
PB03	0	U	0	U	0	0	U	0	U	U	U	C	0	0	0
PB04	0	0	0	0	0	0	0	0	0	U	0	C	0	0	0
PB05	0	0	0	0	0	0	0	0	0	U	0	C	0	0	0
PB06	0	C	0	0	0	0	0	0	0	U	0	C	C	0	0
PB07	0	U	0	0	C	0	U	0	U	U	0	C	C	0	0
PB08	0	U	0	0	0	0	0	0	0	U	0	C	0	0	0
PB09	0	0	0	0	0	0	0	0	0	U	0	C	0	0	0
PB10	0	0	0	C	0	0	0	0	0	U	0	C	0	0	0
PB11	0	0	0	0	0	0	0	0	C	U	0	C	0	0	0
PB12	0	0	0	0	0	0	0	0	0	U	0	C	0	0	0
PB13	0	0	0	0	0	0	0	0	0	U	0	C	0	0	0
PB14	0	0	0	0	0	0	0	0	0	U	0	C	0	0	0
PB15	0	0	0	0	0	0	C	0	0	U	0	C	0	0	0
PB16	0	C	0	0	C	0	C	0	C	U	0	C	C	0	0
PB17	0	0	0	0	0	0	U	0	0	U	0	C	C	0	0
PB18	0	0	0	0	0	0	0	0	0	U	0	C	0	0	0
PB19	0	0	0	0	0	0	0	0	0	U	0	C	0	0	0
PB20	0	U	0	0	0	0	0	0	0	U	0	C	0	0	0
PB21	0	U	0	0	0	0	0	0	0	U	0	C	0	0	0
PB22	0	0	0	0	0	0	0	0	0	U	0	C	0	0	0
PB23	0	0	0	0	0	0	0	0	0	U	0	U	0	0	0
PB24	0	0	0	0	0	0	0	0	0	U	0	C	0	0	0
PB25	0	0	0	0	0	0	0	0	0	U	0	C	0	0	0
PB26	0	C	0	0	0	0	0	0	0	U	0	C	C	0	0
PB27	0	0	0	0	0	0	0	0	0	U	0	C	0	0	0
PB28	0	0	0	0	0	0	0	0	0	U	0	U	0	0	0
PB29	0	0	0	0	0	0	0	0	0	U	0	U	0	0	0
PB31	0	0	0	U	0	0	0	0	C	U	0	U	0	0	0
PB32	0	C	0	U	0	0	U	0	C	U	C	U	0	0	0
PB33	0	C	0	0	0	0	0	0	0	C	U	U	0	0	0
PB34	0	0	0	0	0	0	0	0	0	U	0	C	0	0	0
PB35	0	0	0	0	0	0	0	0	0	U	0	C	0	0	0
PB36	0	0	0	0	0	0	0	0	0	U	0	C	0	0	0
PB37	0	0	0	0	0	0	0	0	0	U	0	C	0	0	0
PB38	0	0	0	0	0	0	0	0	0	U	0	U	0	0	0
PB39	0	C	0	0	0	0	0	0	C	U	0	U	C	0	0
PB41	0	0	0	0	0	0	0	0	0	U	0	C	0	0	0
PB42	0	0	0	0	0	0	0	0	0	U	0	U	0	0	0
PB48	0	0	0	0	0	0	0	0	0	U	0	U	0	0	0
PB49	0	0	0	0	0	0	0	0	0	U	0	U	0	0	0
PB59	0	0	0	0	0	0	0	0	0	U	0	U	0	0	0
PC00	0	0	0	0	0	0	0	0	0	U	C	C	0	0	0
PC01	0	U	0	0	0	0	0	0	U	U	0	U	0	0	0
PC02	0	U	0	0	U	0	C	0	U	U	0	U	0	0	0
PC03	0	0	0	0	0	0	0	0	0	0	0	U	0	0	0
PC04	0	C	0	0	0	0	0	0	0	U	0	U	0	0	0
PC05	0	0	0	0	0	0	0	0	0	U	0	C	0	0	0
PC06	0	C	0	0	0	0	0	0	0	U	0	C	0	0	0
PC07	0	0	0	0	0	0	0	0	0	U	0	C	0	0	0
PC08	0	0	0	0	0	0	0	0	0	U	C	C	C	0	0
PC09	0	C	0	0	C	0	0	0	0	U	0	C	0	0	0
PC10	0	0	0	0	0	0	0	0	0	U	0	C	C	0	0
PC11	0	C	0	0	U	0	U	0	C	U	C	C	U	0	0
PC12	0	U	0	0	U	0	U	0	U	U	U	C	0	0	0
PC13	0	0	0	0	0	0	0	0	0	U	0	U	0	0	0
PC14	0	0	0	0	0	0	0	0	0	U	0	U	0	0	0
PC15	0	0	0	0	0	0	0	0	0	U	0	C	0	0	0
PC16	0	0	0	0	0	0	0	0	0	U	0	C	0	0	0
PC17	0	0	0	0	0	0	0	0	0	U	0	C	0	0	0
PC18	0	U	0	U	U	0	U	0	U	U	U	C	0	0	0
PC19	0	0	0	0	0	0	0	0	0	U	0	C	0	0	0
PC20	0	0	0	0	0	0	0	0	0	U	0	C	0	0	0
PC21	0	U	0	U	U	0	0	0	C	U	U	U	U	0	0
PC22	0	U	0	0	U	0	U	0	U	U	C	U	U	0	0
PC23	0	U	0	0	0	0	0	0	0	C	0	U	0	0	0
PC24	0	0	0	0	0	0	0	0	0	U	0	U	0	0	0
PC25	0	0	0	0	0	0	0	0	0	U	0	C	0	0	0
PC26	0	0	0	0	0	0	0	0	U	U	0	C	0	0	0
PC27	0	0	0	0	0	0	U	0	0	U	0	C	0	0	0
PC28	0	U	0	0	0	0	U	0	U	U	U	C	0	0	0
PC29	0	C	0	0	0	0	0	0	0	U	0	C	0	0	0
PC30	0	0	0	0	0	0	0	0	0	U	0	U	0	0	0
PC31	0	0	0	0	0	0	0	0	0	U	0	U	0	0	0
PC32	0	U	0	U	U	0	C	0	C	U	C	C	U	C	0
PC33	0	0	0	0	U	0	0	0	0	U	0	C	0	0	0
PC34	0	U	0	0	0	0	0	0	0	U	0	C	0	0	0
PC35	0	C	0	0	C	0	0	0	0	U	0	C	0	0	0
PC36	0	0	0	0	0	0	0	0	0	U	0	C	0	0	0
PC37	0	U	0	0	0	0	0	0	0	U	0	C	0	0	0
PC38	0	0	0	0	0	0	0	0	0	U	0	C	0	0	0
PC39	0	0	0	0	0	0	0	0	0	U	0	U	0	0	0
PC40	0	0	0	0	0	0	0	0	0	U	0	U	0	C	0
PC41	0	0	0	0	0	0	0	0	U	U	0	U	0	0	0
PC42	0	C	0	0	U	0	C	0	U	U	C	U	U	0	0
PC43	0	C	0	0	U	0	0	0	U	U	U	U	0	0	0
PC44	0	0	0	0	0	0	0	0	0	U	0	U	0	0	0
PC45	0	0	0	0	0	0	0	0	0	U	0	U	0	0	0
PC46	0	0	0	0	0	0	0	0	0	U	0	C	0	0	0
PC47	0	0	0	0	0	0	0	0	0	U	0	C	C	0	0
PC48	0	0	0	0	0	0	0	0	0	U	0	C	0	0	0
PC49	0	0	0	0	0	0	0	0	0	U	0	C	0	0	0
PC50	0	0	0	0	0	0	0	0	0	U	0	U	0	0	0
PC51	0	0	0	0	0	0	U	0	0	U	0	U	0	0	0
PC52	0	C	0	U	U	0	U	0	U	U	C	U	0	0	0
PC53	0	U	0	0	U	0	0	0	0	U	U	U	0	0	0
PC54	0	0	0	0	0	0	0	0	0	U	0	U	0	0	0
PC55	0	0	0	0	0	0	0	0	0	0	0	U	0	0	0
PC57	0	0	0	0	0	0	0	0	0	U	0	C	0	0	0
PC58	0	0	0	0	0	0	0	0	0	U	0	C	0	0	0
PC59	0	0	0	0	0	0	0	0	0	C	0	U	C	0	0
PC60	0	0	0	0	0	0	0	0	0	U	0	U	0	0	0
PC61	0	0	0	0	0	0	C	0	U	U	0	U	0	0	0
PC62	0	C	0	0	0	0	0	0	C	U	0	C	0	0	0
PC63	0	0	0	0	0	0	0	0	0	U	0	U	0	0	0
PC69	0	0	0	0	0	0	0	0	0	U	0	U	0	0	0
PC70	0	0	0	0	0	0	0	0	0	U	0	U	0	0	0
PC71	0	0	0	0	0	0	0	0	0	U	0	U	0	0	0
PC72	0	C	0	0	U	0	U	0	U	C	0	C	0	C	0
PC73	0	0	0	0	0	0	0	0	0	U	0	C	0	0	0
PC82	0	0	0	0	0	0	0	0	0	U	0	C	0	0	0
PC83	0	0	0	0	0	0	0	0	U	U	0	C	0	0	0
PD00	0	0	0	0	0	0	0	0	0	U	0	C	0	0	0
PD01	0	0	0	0	0	0	0	0	0	U	0	U	0	0	0
PD02	0	0	0	0	0	0	0	0	0	U	C	C	0	0	0
PD03	0	0	0	0	0	0	0	0	0	U	0	U	0	0	0
PD04	0	0	0	0	0	0	0	0	0	U	0	U	0	0	0
PD05	0	0	0	0	0	0	0	0	0	U	0	C	0	0	0
PD06	0	C	0	0	0	0	0	0	0	U	0	C	0	0	0
PD07	0	0	0	0	0	0	0	0	0	U	0	C	0	0	0
PD08	0	0	0	0	0	0	0	0	0	U	0	U	0	0	0
PD09	0	C	0	0	0	0	C	0	0	U	0	U	0	0	0
PD10	0	0	0	0	0	0	0	0	0	0	0	U	0	0	0
PD11	0	0	0	0	0	0	0	0	0	U	0	U	0	0	0
PD12	0	0	0	0	0	0	0	0	0	U	0	C	0	0	0
PD13	0	0	0	0	0	0	0	0	0	U	0	U	0	0	0
PD14	0	0	0	0	0	0	0	0	0	U	0	U	0	0	0
PD15	0	C	0	0	0	0	0	0	0	U	0	C	0	0	0
PD16	0	0	0	0	0	0	0	0	0	U	0	C	0	0	0
PD17	0	0	0	0	0	0	0	0	0	U	0	C	0	0	0
PD18	0	0	0	0	0	0	0	0	0	U	0	C	0	0	0
PD19	0	C	0	0	0	0	0	0	0	U	0	U	0	0	0
PD20	0	0	0	0	0	0	0	0	0	U	0	U	0	0	0
PD21	0	0	0	0	0	0	0	0	0	U	0	U	0	0	0
PD22	0	0	0	0	0	0	0	0	0	U	0	C	0	0	0
PD23	0	C	0	0	0	0	0	0	0	U	0	C	0	0	0
PD24	0	0	0	0	0	0	0	0	0	U	0	C	0	0	0
PD25	0	0	0	0	0	0	0	0	0	U	0	C	0	0	0
PD26	0	0	0	0	0	0	0	0	0	U	0	C	0	0	0
PD27	0	0	0	0	0	0	0	0	0	U	U	C	0	0	0
PD28	0	0	0	0	0	0	0	0	0	U	0	C	0	0	0
PD29	0	C	0	0	0	0	0	0	C	U	0	U	0	0	0
PD30	0	0	0	0	0	0	0	0	0	U	0	U	0	0	0
PD31	0	0	0	0	0	0	0	0	0	U	0	C	0	0	0
PD32	0	C	0	0	C	0	0	0	C	U	C	C	0	0	0
PD33	0	C	0	C	0	0	C	0	0	U	C	C	0	0	0
PD34	0	C	0	0	C	0	0	0	C	U	0	C	0	0	0
PD35	0	C	0	0	0	0	0	0	0	C	0	C	0	0	0
PD36	0	C	0	0	0	0	0	0	0	U	C	C	0	0	0
PD37	0	C	0	0	0	0	0	0	0	U	0	C	0	0	0
PD38	0	0	0	0	0	0	0	0	0	U	0	C	0	0	0
PD39	0	C	0	0	0	0	U	0	0	U	0	C	U	0	0
PD40	0	0	0	C	0	0	0	0	0	U	0	C	0	0	0
PD41	0	0	0	0	0	0	0	0	0	U	0	U	0	0	0
PD42	0	C	0	0	0	0	0	0	0	U	0	C	0	0	0
PD43	0	0	0	C	0	0	0	0	0	U	0	C	0	0	0
PD44	0	U	0	0	0	0	0	0	0	U	U	C	0	0	0
PD45	0	0	0	0	0	0	0	0	0	U	0	C	0	0	0
PD46	0	0	0	0	0	0	0	0	0	U	0	C	0	0	0
PD47	0	0	0	0	0	0	0	0	0	U	0	C	0	0	0
PD48	0	0	0	0	0	0	0	0	0	U	0	U	0	0	0
PD49	0	U	0	0	U	0	C	0	U	U	0	C	U	0	0
PD50	0	0	0	0	0	0	0	0	0	0	0	C	0	0	0
PD51	0	0	0	0	0	0	0	0	0	U	0	U	0	0	0
PD52	0	0	0	0	0	0	0	0	0	U	0	C	0	0	0
PD53	0	0	0	0	0	0	0	0	0	U	0	C	0	0	0
PD54	0	0	0	0	0	0	0	0	0	U	0	C	0	0	0
PD55	0	0	0	0	0	0	0	0	0	0	0	C	0	0	0
PD59	0	C	0	0	0	0	C	0	U	U	0	C	C	0	0
PD60	0	U	0	0	0	0	0	0	0	U	0	U	0	0	0
PD61	0	U	0	0	0	0	0	0	0	U	U	C	0	0	0
PD62	0	0	0	0	0	0	0	0	0	U	0	C	0	0	0
PD63	0	0	0	0	0	0	0	0	0	U	0	C	0	0	0
PD69	0	C	0	0	0	0	U	0	0	U	0	U	C	0	0
PD70	0	0	0	0	0	0	0	0	0	U	0	U	0	0	0
PD71	0	0	0	0	0	0	0	0	0	0	0	C	0	0	0
PD72	0	0	0	0	0	0	0	0	0	U	0	C	0	0	0
PD73	0	0	0	0	0	0	0	0	0	U	0	C	0	0	0
PD79	0	U	0	0	0	0	U	0	0	U	U	U	U	0	0
PE00	0	0	0	0	0	0	0	0	0	U	0	C	0	0	0
PE01	0	0	0	0	0	0	0	0	0	U	0	C	0	0	0
PE02	0	0	0	0	0	0	0	0	0	U	0	C	0	0	0
PE03	0	0	0	0	0	0	C	0	0	U	0	C	0	0	0
PE04	0	0	0	0	0	0	0	0	0	U	0	U	0	0	0
PE05	0	0	0	0	0	0	0	0	0	U	0	U	0	0	0
PE06	0	C	0	0	0	0	0	0	0	U	0	C	0	0	0
PE07	0	C	0	0	0	0	C	0	C	C	C	C	0	0	0
PE08	0	C	0	0	0	0	0	0	0	U	0	C	0	0	0
PE09	0	C	0	0	0	0	0	0	C	U	C	0	0	0	0
PE10	0	0	0	0	0	0	0	0	0	U	0	U	0	0	0
PE11	0	0	0	0	0	0	0	0	0	U	0	U	0	0	0
PE12	0	0	0	0	0	0	0	0	0	U	0	U	0	0	0
PE13	0	0	0	0	0	0	0	0	0	U	0	U	0	0	0
PE14	0	0	0	0	0	0	C	0	0	U	0	C	0	0	0
PE15	0	0	0	0	0	0	0	0	0	U	0	C	0	0	0
PE16	0	C	0	0	0	0	0	0	0	U	0	C	U	0	0
PE17	0	C	0	0	0	0	0	0	0	U	0	C	0	0	0
PE18	0	C	0	C	0	0	C	U	C	U	C	C	0	0	0
PE19	0	C	0	0	0	0	0	0	0	U	0	0	0	0	0
PE20	0	0	0	0	0	0	U	0	0	U	0	U	0	0	0
PE21	0	C	0	0	0	0	0	0	0	U	0	C	0	0	0
PE22	0	0	0	0	0	0	0	0	0	U	0	U	0	0	0
PE23	0	0	0	0	0	0	0	0	0	U	0	U	0	0	0
PE24	0	0	0	0	C	0	0	0	0	U	0	C	0	0	0
PE25	0	0	0	0	0	0	0	0	0	U	0	U	0	0	0
PE26	0	C	0	0	0	0	0	0	0	U	0	U	0	0	0
PE27	0	C	0	0	0	0	C	0	0	U	C	C	U	0	0
PE28	0	C	0	0	0	0	C	0	0	U	0	U	0	0	0
PE29	0	C	0	0	0	0	0	0	0	U	0	C	0	0	0
PE30	0	U	0	0	U	0	U	0	U	C	U	U	C	0	0
PE31	0	C	0	0	0	0	0	U	0	U	0	C	0	0	0
PE32	0	C	0	0	0	0	0	U	0	U	0	U	0	0	0
PE33	0	0	0	0	0	0	0	0	0	U	0	C	0	0	0
PE34	0	C	0	0	0	0	0	0	0	U	0	C	0	0	0
PE35	0	0	0	0	0	0	0	U	0	U	0	C	0	0	0
PE36	0	C	0	0	0	0	0	0	0	U	0	C	0	0	0
PE37	0	0	0	0	0	0	C	0	0	U	C	C	0	0	0
PE38	0	0	0	0	0	0	0	0	0	U	0	C	0	0	0
PE39	0	C	0	0	0	0	C	0	0	U	0	C	0	0	0
PE40	0	0	0	0	0	0	0	0	C	C	0	U	0	0	0
PE41	0	C	0	0	0	0	U	0	0	C	U	U	C	0	0
PE42	C	U	0	0	0	0	0	0	0	U	0	U	0	0	0
PE43	0	0	0	0	0	0	0	0	0	U	0	C	0	0	0
PE44	0	0	0	0	0	0	0	U	0	U	0	C	0	0	0
PE45	0	0	0	0	0	0	0	U	0	U	0	C	0	0	0
PE46	0	0	0	0	0	0	0	0	0	U	0	C	0	0	0
PE47	0	0	0	0	0	0	0	0	0	U	0	U	0	0	0
PE48	0	C	0	0	0	0	C	0	0	C	0	C	0	0	0
PE49	0	C	0	0	0	0	C	0	C	C	0	C	0	0	0
PE50	0	C	0	0	0	0	U	0	C	U	U	U	0	0	0
PE51	0	C	0	0	0	0	C	0	0	C	U	C	0	0	0
PE52	0	0	0	0	0	0	0	0	0	U	0	U	0	0	0
PE53	0	0	0	0	0	0	0	U	0	U	0	C	0	0	0
PE54	0	0	0	0	0	0	0	0	0	U	0	C	0	0	0
PE55	0	U	0	0	0	0	0	0	0	U	0	C	0	0	0
PE56	0	C	0	0	0	0	0	0	0	U	0	U	0	0	0
PE57	0	C	0	0	0	0	0	0	0	U	0	U	0	0	0
PE58	U	C	0	0	0	0	0	0	C	U	0	C	0	0	0
PE59	U	C	0	0	0	0	C	0	0	U	0	C	0	0	0
PE60	0	C	0	0	0	0	C	0	0	U	0	C	0	0	0
PE61	0	C	0	0	0	0	0	0	0	U	0	C	0	0	0
PE62	0	0	0	0	0	0	0	U	0	U	0	U	0	0	0
PE63	0	0	0	0	0	0	C	U	0	U	0	U	0	0	0
PE64	0	0	0	0	0	0	0	0	0	U	0	C	0	0	0
PE65	0	U	0	0	0	0	0	0	0	U	C	C	C	0	0
PE66	0	C	0	0	0	0	0	0	0	U	0	C	U	0	0
PE67	U	0	0	0	0	0	0	0	0	U	0	U	0	0	0
PE68	C	0	0	0	0	0	0	0	0	U	0	U	0	0	0
PE69	C	U	0	0	0	0	0	0	0	U	C	C	0	0	0
PE70	0	C	0	0	0	0	U	0	0	U	U	U	0	0	0
PE71	0	C	0	0	U	0	C	0	U	U	U	U	U	0	0
PE72	0	0	0	0	0	0	C	0	0	U	0	U	0	0	0
PE73	0	U	0	0	0	0	0	0	0	U	0	U	0	0	0
PE74	0	0	0	0	0	0	0	0	0	U	0	C	0	0	0
PE75	U	0	0	0	0	0	0	0	0	U	C	C	U	0	0
PE76	0	U	0	0	0	0	U	U	0	U	0	U	U	0	0
PE77	U	U	0	0	0	0	0	0	0	U	0	U	0	0	0
PE78	U	C	0	0	0	0	0	0	0	U	0	U	0	0	0
PE79	0	U	0	0	0	0	0	0	0	U	U	U	0	0	0
PE82	0	0	0	0	0	0	0	0	0	U	0	U	0	0	0
PE83	0	0	0	0	0	0	0	0	0	U	0	U	0	0	0
PE85	0	0	0	0	0	0	0	0	0	U	0	U	0	0	0
PE86	0	0	0	0	0	0	0	0	0	U	0	U	0	0	0
PE87	U	0	0	0	0	0	0	0	0	U	0	U	0	0	0
PE88	C	0	0	0	0	0	0	0	0	0	0	U	0	0	0
PE89	0	0	0	0	0	0	0	0	0	U	0	U	0	0	0
PF00	0	0	0	0	0	0	0	0	0	U	0	U	0	0	0
PF01	U	C	0	0	0	0	C	0	0	U	0	U	0	0	0
PF02	C	C	0	C	0	0	0	0	C	U	0	C	0	0	0
PF03	C	C	0	0	0	0	C	0	C	U	C	C	0	0	0
PF04	C	C	0	0	0	0	C	0	0	U	0	C	0	0	0
PF05	0	C	0	0	0	0	0	0	0	U	0	C	C	0	0
PF06	U	0	0	0	0	0	0	0	C	U	0	C	0	0	0
PF07	U	C	0	0	0	0	0	0	0	U	U	C	0	0	0
PF08	C	C	U	0	0	0	0	0	0	U	U	C	U	0	0
PF09	C	0	0	0	0	0	0	0	0	U	0	0	0	0	0
PF10	0	0	0	0	0	0	0	0	0	U	0	C	0	0	0
PF11	C	C	0	0	0	0	0	0	U	U	0	U	0	0	0
PF12	C	C	0	0	0	0	C	0	U	C	C	C	0	0	0
PF13	C	C	0	0	0	0	C	0	C	U	C	C	C	0	0
PF14	U	0	0	0	0	0	C	U	0	0	0	U	0	0	0
PF15	0	0	0	0	0	0	0	U	0	U	0	U	0	0	0
PF16	0	C	0	0	0	0	0	0	0	U	0	0	0	0	0
PF17	U	0	0	0	0	0	0	0	0	U	0	C	C	0	0
PF18	C	0	0	C	0	0	0	0	0	U	0	0	0	0	0
PF19	C	0	0	0	0	0	0	0	0	U	0	0	0	0	0
PF20	U	0	0	0	0	0	0	0	0	U	0	C	0	0	0
PF21	C	C	0	0	0	0	0	0	0	U	0	U	0	0	0
PF22	U	C	0	0	0	0	C	0	0	U	0	U	0	0	0
PF23	U	C	C	0	C	0	C	0	0	U	C	U	0	0	0
PF24	U	0	0	0	0	0	0	0	0	U	0	U	0	0	0
PF25	0	0	0	0	0	0	0	0	0	U	0	C	0	0	0
PF26	0	0	0	0	0	0	0	0	0	U	0	0	0	0	0
PF27	U	C	0	0	0	0	C	0	C	U	0	0	0	0	0
PF28	U	0	0	0	0	0	0	0	0	U	0	0	0	0	0
PF29	U	0	0	0	0	0	0	0	0	U	0	0	0	0	0
PF30	U	C	0	0	0	0	C	U	0	U	0	C	0	0	0
PF31	U	C	0	0	0	0	0	U	0	U	0	U	0	0	0
PF32	C	C	0	0	0	0	0	0	0	U	0	U	0	0	0
PF33	C	C	0	C	0	0	0	0	0	U	0	C	0	0	0
PF34	C	0	0	0	0	0	0	U	U	0	0	C	0	0	0
PF35	0	C	0	0	0	0	0	U	0	U	0	C	0	0	0
PF36	0	U	0	0	0	0	0	U	0	C	0	0	0	0	0
PF37	0	C	0	0	0	C	0	U	0	C	0	0	0	0	0
PF38	U	0	0	0	0	0	0	U	0	U	0	0	0	0	0
PF39	U	0	0	0	0	0	0	0	0	U	0	0	0	0	0
PF40	U	0	0	0	0	0	0	U	0	C	0	C	0	0	0
PF41	U	C	0	0	0	0	C	U	0	C	C	U	0	0	0
PF42	U	0	0	0	0	0	0	0	0	U	0	U	0	0	0
PF43	U	0	0	0	0	0	C	0	0	U	0	U	0	0	0
PF44	0	0	0	0	0	0	0	0	0	U	0	U	0	0	0
PF45	0	0	0	0	0	0	0	U	0	U	0	U	0	0	0
PF46	0	C	0	0	0	0	0	0	0	U	0	0	0	0	0
PF47	0	0	0	0	0	0	0	0	0	U	0	U	0	0	0
PF48	U	0	0	0	0	0	0	0	0	U	0	C	0	0	0
PF49	U	0	0	0	0	0	0	0	0	U	0	C	0	0	0
PF50	U	0	0	0	0	0	0	0	0	U	0	U	0	0	0
PF51	0	C	0	0	0	0	0	0	0	U	0	U	0	0	0
PF52	0	U	0	0	0	0	0	0	U	U	U	U	U	0	0
PF53	0	C	0	0	0	0	U	0	U	C	U	U	C	0	0
PF54	0	C	0	0	0	0	C	0	U	U	C	U	0	0	0
PF55	0	U	0	0	0	0	0	0	0	U	0	U	0	0	0
PF56	0	0	0	0	0	0	0	0	0	U	0	C	0	0	0
PF57	0	C	0	0	0	0	0	0	0	U	0	U	0	0	0
PF58	0	0	0	0	0	0	0	0	0	U	0	C	0	0	0
PF59	0	0	0	0	0	0	0	0	0	U	0	C	0	0	0
PF60	C	0	0	0	0	0	0	0	0	U	0	U	0	0	0
PF61	0	U	0	U	0	0	C	0	C	C	U	U	C	0	0
PF62	C	U	0	0	0	0	C	U	U	U	U	C	U	0	0
PF63	0	C	0	C	0	0	C	0	C	C	0	C	U	0	0
PF64	C	U	0	0	0	0	0	0	U	U	0	U	0	0	0
PF65	0	0	0	0	0	0	0	0	0	U	0	C	0	0	0
PF66	0	0	0	0	0	0	0	0	0	U	0	C	0	0	0
PF67	0	0	0	0	0	0	0	U	0	U	0	U	0	0	0
PF68	0	C	0	0	0	0	C	0	0	U	0	U	0	0	0
PF69	U	C	0	0	0	0	0	0	0	U	0	C	0	0	0
PF70	C	0	0	0	0	0	0	0	0	U	C	U	0	0	0
PF71	0	U	0	0	0	0	0	0	C	U	0	U	0	0	0
PF72	C	C	0	0	0	0	U	0	0	U	0	C	0	0	0
PF73	0	U	0	U	U	0	U	0	0	U	U	C	0	0	0
PF74	C	U	0	U	U	0	U	U	U	U	0	C	0	0	0
PF75	0	0	0	0	0	0	U	U	0	U	0	C	0	0	0
PF76	U	0	0	0	0	0	0	U	0	U	0	C	0	0	0
PF77	U	C	0	0	0	0	C	0	C	U	0	U	0	0	0
PF78	U	0	0	0	0	0	0	0	0	U	0	U	0	0	0
PF79	C	C	0	0	0	0	0	0	C	U	0	C	0	0	0
PF80	C	0	0	0	0	0	0	0	0	U	0	U	0	0	0
PF81	C	U	0	0	0	0	U	0	0	U	0	U	0	0	0
PF82	0	U	0	0	0	0	U	0	0	U	0	C	0	0	0
PF83	0	0	0	U	0	0	U	0	0	U	0	C	0	0	0
PF84	0	U	0	0	0	0	U	0	C	U	U	C	U	0	0
PF85	0	C	0	0	0	0	C	0	0	U	0	C	0	0	0
PF86	U	0	0	0	0	0	0	0	0	U	0	C	0	0	0
PF87	U	C	0	0	0	0	0	0	0	U	0	C	0	0	0
PF88	U	0	0	0	0	0	0	0	0	U	0	C	0	0	0
PF89	U	0	0	0	0	0	0	0	0	U	0	C	0	0	0
PF95	0	0	0	0	0	0	0	0	0	U	0	C	0	0	0
PF96	U	0	0	0	0	0	0	0	0	U	0	C	0	0	0
PF97	C	C	0	C	0	0	0	0	0	C	0	C	0	0	0
PF98	C	C	0	0	0	0	0	0	0	U	0	C	C	0	0
PF99	U	0	0	0	0	0	0	0	0	U	0	U	0	0	0
PG00	U	0	0	0	0	0	0	U	0	U	0	0	0	0	0
PG01	U	U	0	0	0	0	0	U	U	U	0	0	0	0	0
PG02	U	C	U	0	C	0	0	0	0	U	0	0	C	0	0
PG03	C	C	0	C	C	0	0	0	0	U	0	0	C	0	0
PG04	U	0	0	0	0	0	0	0	0	U	0	0	0	0	0
PG10	U	0	C	0	0	0	0	U	0	U	0	0	0	0	0
PG11	C	0	0	0	0	0	0	0	0	U	0	0	0	0	0
PG12	U	0	0	0	0	0	0	0	U	U	0	0	0	0	0
PG13	U	0	0	0	0	0	0	0	0	U	C	0	0	0	0
PG20	U	0	0	0	0	0	0	0	0	U	0	0	0	0	0
PG21	U	C	0	0	0	0	0	U	0	U	0	0	0	0	0
PG22	U	C	0	0	0	0	0	U	0	U	0	0	0	0	0
PG23	U	0	0	0	0	0	0	0	0	0	0	0	0	0	0
PG30	U	0	0	0	0	0	0	0	0	U	0	0	0	0	0
PG31	U	0	0	0	0	0	0	0	0	0	0	0	0	0	0
PG32	U	0	0	0	0	C	0	U	0	U	0	0	0	0	0
PG33	U	0	0	0	0	0	0	U	0	0	0	0	0	0	0
PG40	U	C	0	0	0	0	0	0	0	U	0	C	0	0	0
PG41	U	0	0	0	0	0	0	0	0	U	0	0	0	0	0
PG42	U	0	0	0	0	0	0	U	0	U	0	0	0	0	0
PG43	U	0	0	0	0	0	0	0	0	U	0	0	0	0	0
PG50	U	0	0	0	0	0	0	0	0	U	0	C	0	0	0
PG51	U	0	0	0	0	0	0	0	0	U	0	C	0	0	0
PG52	U	0	0	0	0	0	0	0	0	U	0	0	0	0	0
PG53	U	0	0	0	0	0	0	0	0	U	0	0	0	0	0
PG54	C	0	0	0	0	0	0	U	0	U	0	0	0	0	0
PG55	U	0	0	0	0	0	0	0	0	U	0	0	0	0	0
PG60	U	0	0	0	0	0	0	0	0	0	0	C	0	0	0
PG61	U	0	0	0	0	0	0	0	0	U	0	C	0	0	0
PG62	U	0	0	0	0	0	0	0	0	U	0	0	0	0	0
PG63	U	0	0	0	0	0	0	0	0	U	0	0	0	0	0
PG64	U	0	0	0	0	0	0	C	0	U	0	0	0	0	0
PG70	U	C	0	0	0	0	0	0	0	U	0	C	0	0	0
PG71	U	0	0	0	0	0	0	0	0	U	0	C	0	0	0
PG72	C	0	0	0	0	0	0	0	0	U	0	U	0	0	0
PG73	C	0	0	0	0	0	0	0	0	U	0	U	0	0	0
PG74	C	0	0	0	0	0	0	0	0	U	0	U	0	0	0
PG80	U	0	0	0	0	0	0	0	0	U	0	U	0	0	0
PG81	U	C	0	0	0	0	0	0	0	U	0	U	0	0	0
PG82	U	0	0	0	0	0	0	U	0	U	0	U	0	0	0
PG83	U	U	0	0	0	0	0	0	0	U	0	U	0	0	0
PG84	C	C	0	0	0	0	0	0	0	U	0	U	0	0	0
PG85	U	0	0	0	0	0	0	0	0	U	0	U	0	0	0
PG90	C	0	0	0	0	0	0	0	0	U	0	U	0	0	0
PG91	C	0	0	0	0	0	0	0	0	U	0	U	0	0	0
PG92	C	0	0	0	0	0	0	0	0	C	0	U	0	0	0
PG93	U	0	0	0	0	0	0	U	0	U	0	U	0	0	0
PG94	C	C	0	0	0	0	0	0	0	U	0	U	0	0	0
QF06	U	0	0	0	0	0	0	0	0	U	0	C	0	0	0
QF07	U	U	0	U	U	0	0	0	0	U	0	C	0	0	0
QF08	C	C	0	U	U	0	C	0	0	0	0	C	0	0	0
QF09	U	0	0	0	0	0	0	0	0	U	0	U	0	0	0
QF17	U	U	0	0	0	0	U	0	0	U	0	C	C	0	0
QF18	U	C	0	U	0	0	U	0	0	U	0	C	0	0	0
QF19	C	C	0	C	0	0	C	0	0	C	C	C	0	0	0
QF28	U	0	0	0	0	0	0	0	0	U	0	C	0	0	0
QF29	U	U	0	0	U	0	U	0	C	U	C	C	0	0	0
QG00	U	C	0	0	0	0	C	U	U	U	C	U	0	0	0
QG01	U	0	0	0	0	0	0	0	0	U	0	U	0	0	0
QG02	U	0	0	0	0	0	0	0	0	U	0	U	0	0	0
QG03	C	0	0	0	0	0	0	0	0	U	0	U	0	0	0
QG04	U	0	0	0	0	0	0	U	0	U	0	U	0	0	0
QG10	U	0	0	0	0	0	0	0	0	U	0	U	0	0	0
QG11	U	0	0	0	0	U	0	0	0	U	0	U	0	0	0
QG20	U	U	0	0	U	0	0	0	U	U	0	C	C	0	0
QG21	C	U	0	0	0	0	0	0	0	U	0	C	0	0	0
QG30	C	U	0	U	U	0	0	0	U	U	U	C	0	0	0
QG31	0	0	0	0	0	0	0	0	0	U	0	C	0	0	0
